# Supplementary material for: Water, Energy, and Carbon with Artificial Neural Networks (WECANN): a statistically based estimate of global surface turbulent fluxes and gross primary productivity using solar-induced fluorescence
Source: Copernicus journal article supplement (doi:10.5194/bg-14-4101-2017), 2017-09-20
Supplement: Supplementary file [file bg-14-4101-2017-supplement.pdf]

Supplement of Biogeosciences, 14, 4101–4124, 2017  
<https://doi.org/10.5194/bg-14-4101-2017-supplement>  
© Author(s) 2017. This work is distributed under  
the Creative Commons Attribution 3.0 License.

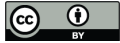

*Supplement of*

**Water, Energy, and Carbon with Artificial Neural Networks (WECANN):  
a statistically based estimate of global surface turbulent fluxes and gross  
primary productivity using solar-induced fluorescence**

**Seyed Hamed Alemohammad et al.**

*Correspondence to:* Pierre Gentine ([pg2328@columbia.edu](mailto:pg2328@columbia.edu))

The copyright of individual parts of the supplement might differ from the CC BY 3.0 License.

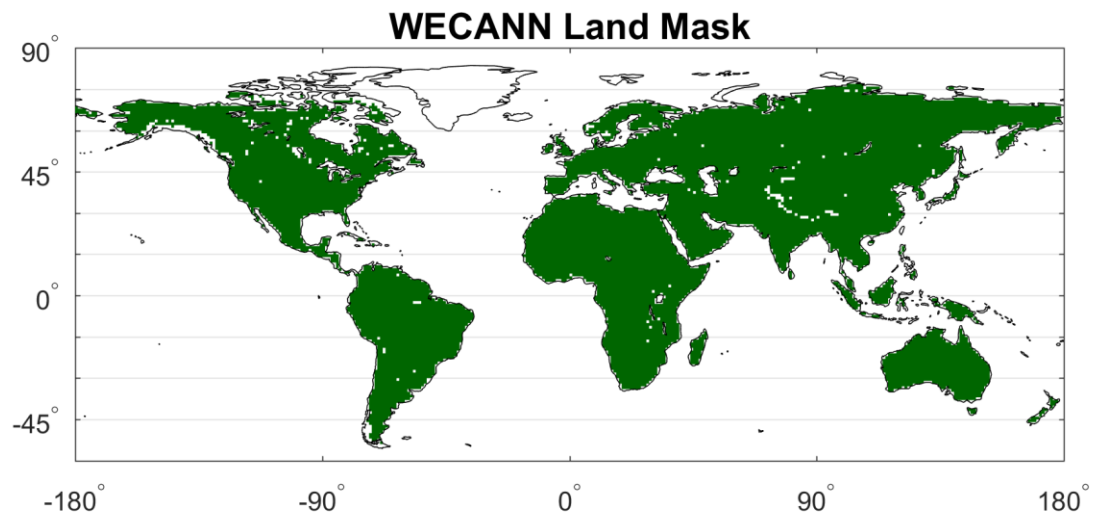

**Figure S1: Spatial coverage of WECANN retrievals. Green pixels show where WECANN retrievals are provided.**

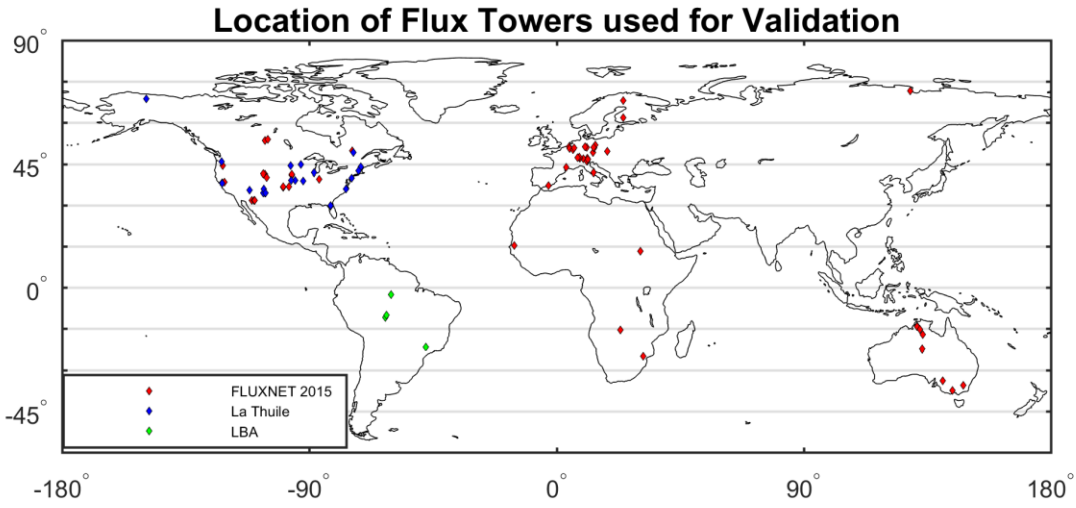

**Figure S2: Location of flux towers used in validation of WECANN retrievals. Red diamonds indicate measurements from FLUXNET 2015 dataset, blue diamonds indicate measurements from the AmeriFlux La Thuile Synthesis Dataset, and green diamonds indicate measurements from the Large-scale Biosphere-Atmosphere (LBA) experiment in Brazil.**

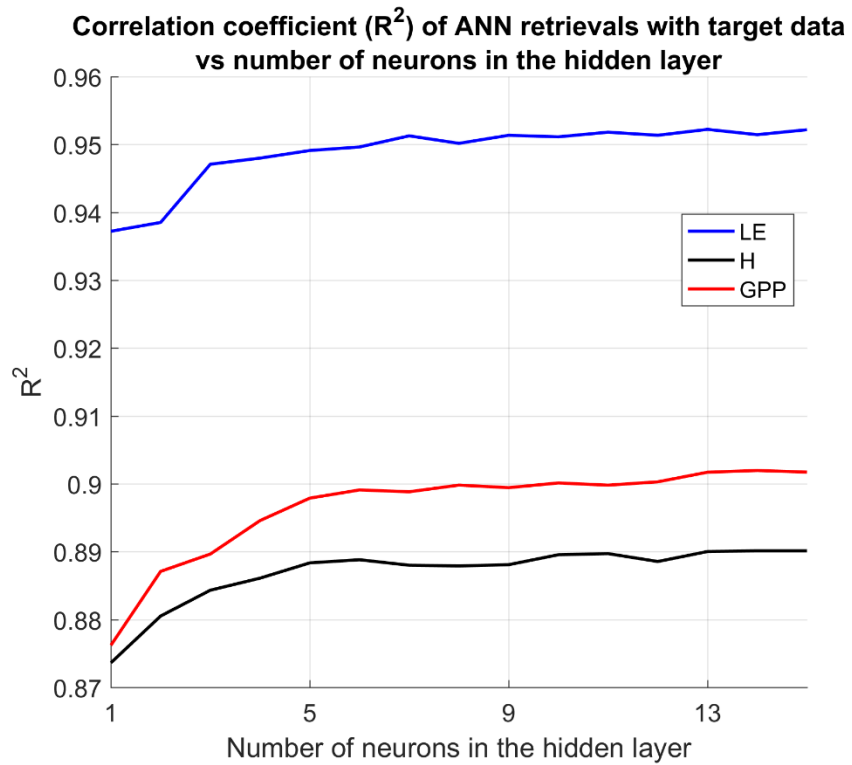

**Figure S3: Correlation coefficients ( $R^2$ ) between ANN retrievals of LE, H, and GPP and target data as a function of number of neurons in hidden layer.**

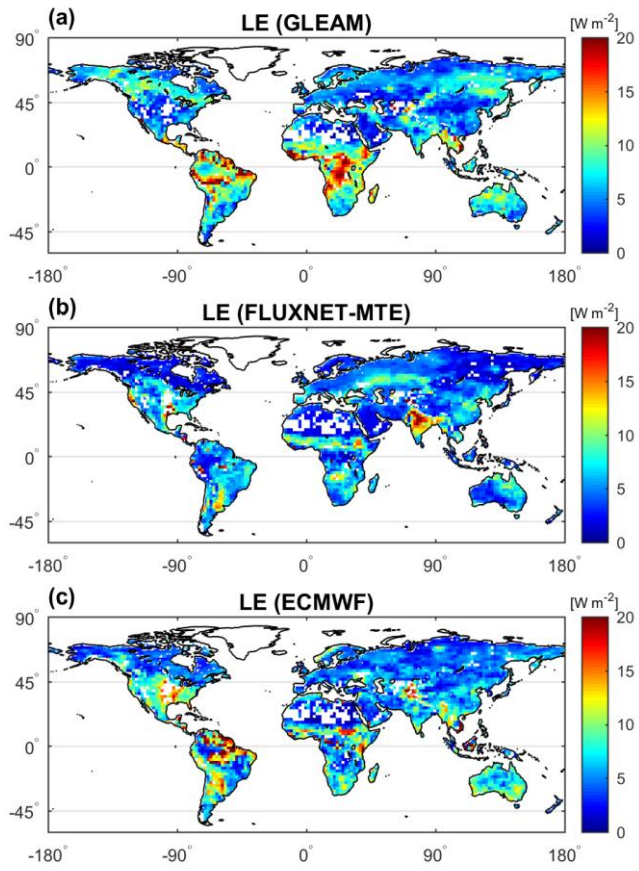

Figure S4: RMSE of LE for each of the three training datasets estimated by Triple Collocation (2008-2010).

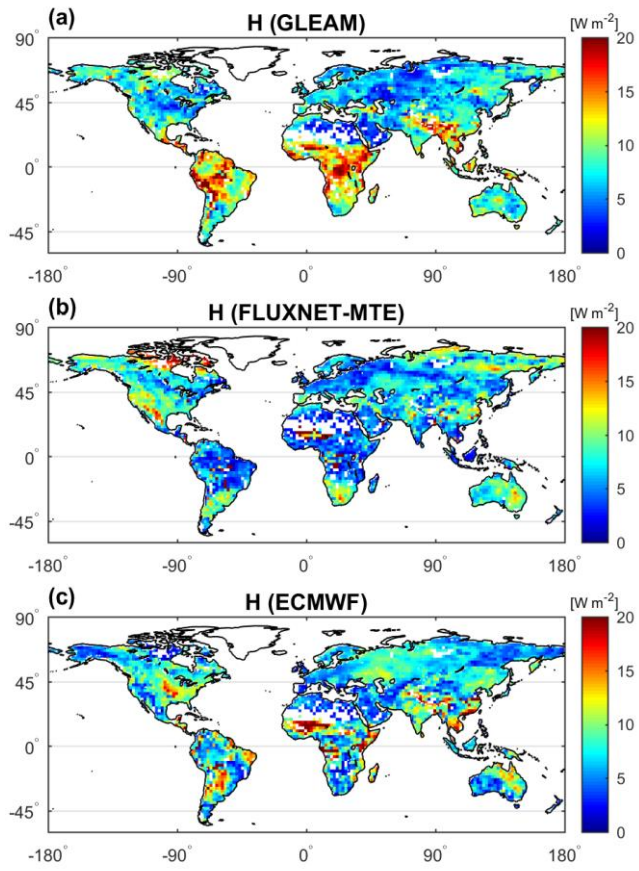

Figure S5: Similar to Figure S1 for H.

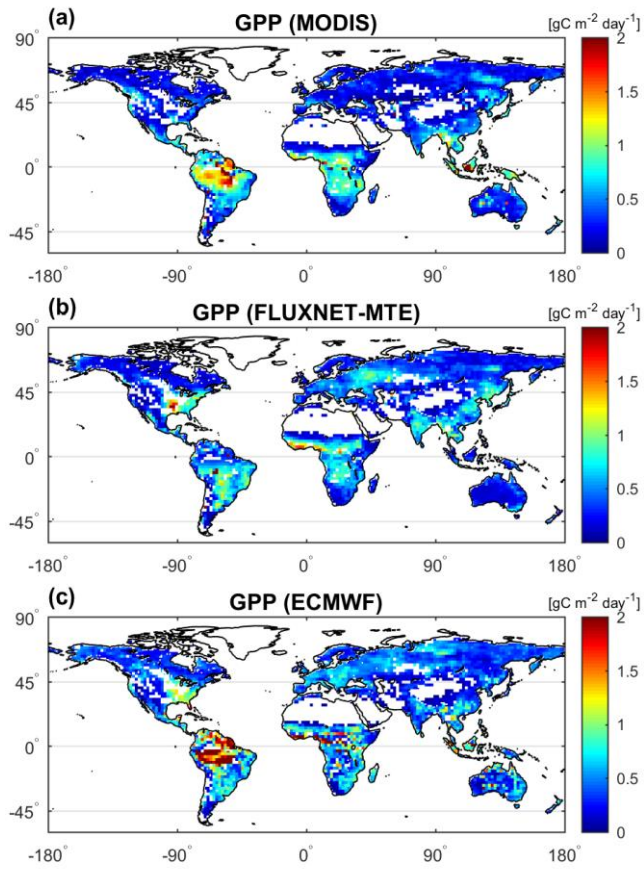

**Figure S6: Similar to Figure S1 for GPP.**

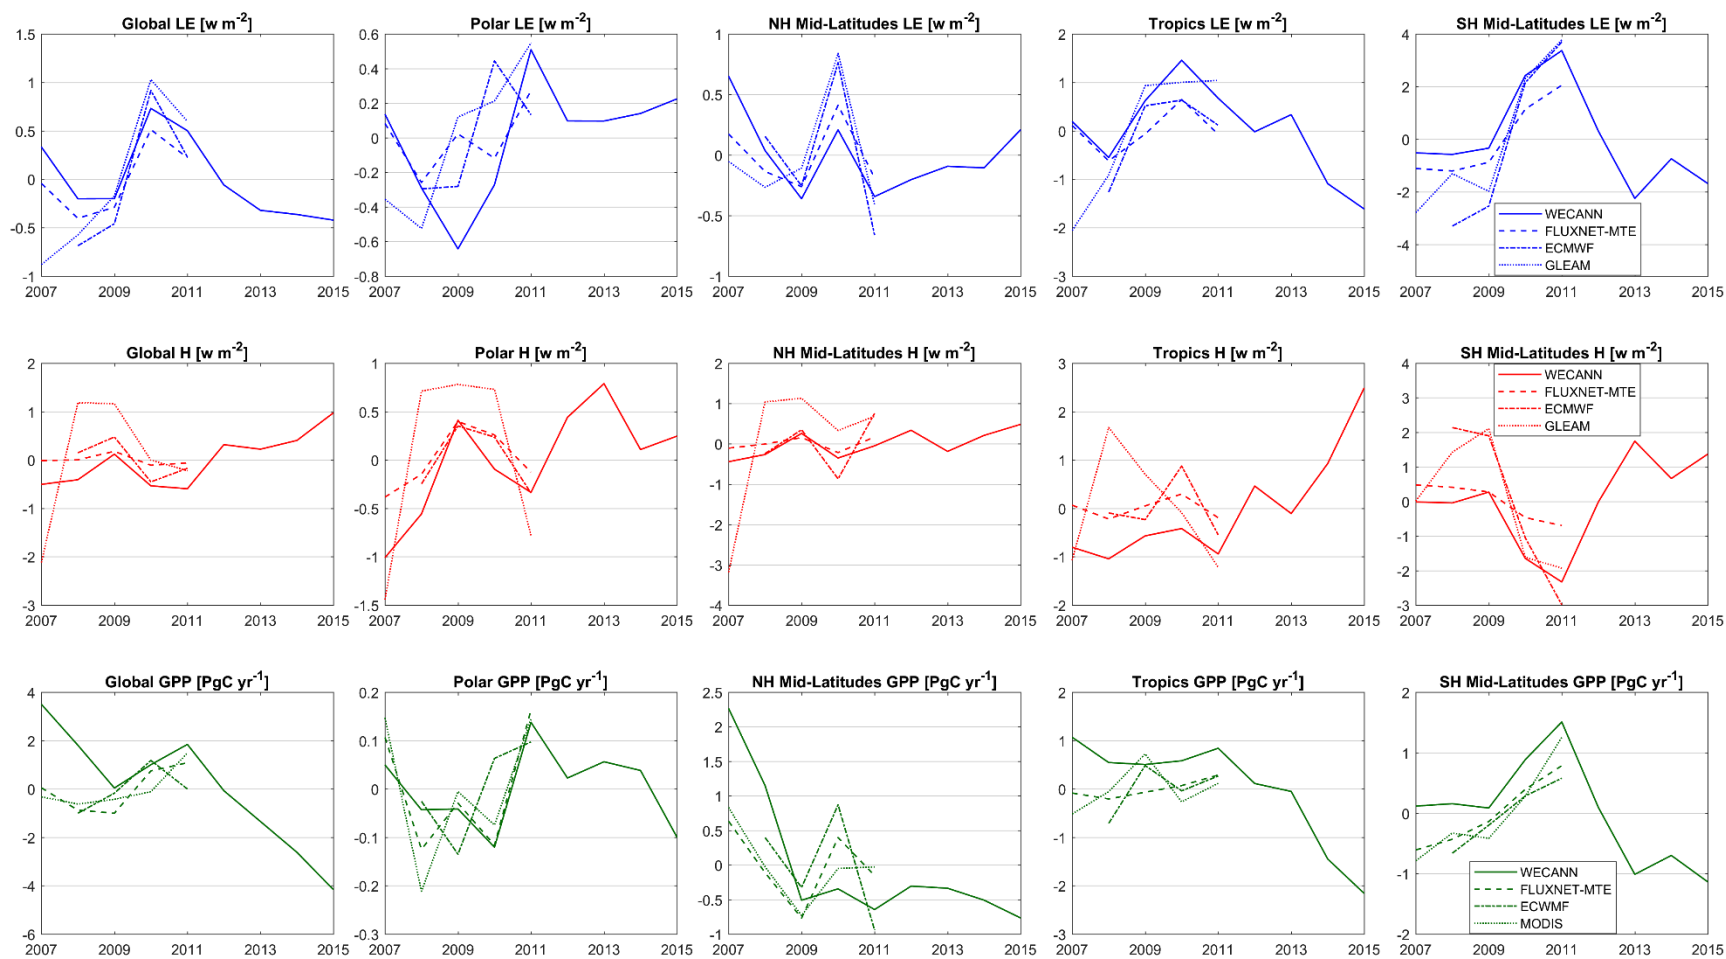

**Figure S7- Annual mean anomalies of LE (top row), H (middle row) and GPP (bottom row) retrievals at global (left column) and regional (four right columns) scales for WECANN (solid lines) and three other training products.**



**Table S1: List of eddy covariance tower sites used for evaluation. FLX refers to data from FLUXNET2015 dataset, LTH refers to measurements from La Thuile Synthesis Dataset, and LBA refers to measurements from Large-scale Biosphere-Atmosphere (LBA) experiment**

| Site ID | Database | Temporal Coverage | Reference                                                          |
|---------|----------|-------------------|--------------------------------------------------------------------|
| AT-Neu  | FLX      | 01/2007 - 12/2012 | (Wohlfahrt et al., 2008)                                           |
| AU-ASM  | FLX      | 01/2010 - 12/2014 | (Cleverly et al., 2013; Eamus et al., 2013)                        |
| AU-Cpr  | FLX      | 01/2010 - 12/2014 | (Meyer et al., 2015)                                               |
| AU-DaP  | FLX      | 01/2007 - 12/2013 | (Beringer et al., 2016)                                            |
| AU-DaS  | FLX      | 01/2008 - 12/2014 | (Beringer et al., 2016)                                            |
| AU-Dry  | FLX      | 01/2008 - 12/2014 | (Beringer et al., 2016)                                            |
| AU-Stp  | FLX      | 01/2008 - 12/2014 | (Beringer et al., 2016)                                            |
| AU-Tum  | FLX      | 01/2007 - 12/2014 | (Beringer et al., 2016)                                            |
| AU-Wom  | FLX      | 01/2010 - 12/2014 | (Hinko-Najera et al., 2017)                                        |
| BE-Bra  | FLX      | 01/2007 - 12/2014 | (de Pury and Ceulemans, 1997)                                      |
| BE-Lon  | FLX      | 01/2007 - 12/2014 | (Moureaux et al., 2006)                                            |
| BE-Vie  | FLX      | 01/2007 - 12/2014 | (Aubinet et al., 2001)                                             |
| BR-Ji1  | LBA      | 01/1999 - 12/2003 | (Araújo et al., 2002; Rocha et al., 2002; von Randow et al., 2004) |
| BR-Ji2  | LBA      | 01/1999 - 12/2003 | (Araújo et al., 2002; Rocha et al., 2002; von Randow et al., 2004) |
| BR-Ma2  | LBA      | 01/1999 - 12/2003 | (Araújo et al., 2002; Rocha et al., 2002; von Randow et al., 2004) |
| BR-Sp1  | LBA      | 01/1999 - 12/2003 | (Araújo et al., 2002; Rocha et al., 2002; von Randow et al., 2004) |
| CA-Oas  | FLX      | 01/2007 - 12/2010 | (Barr et al., 2012; Zha et al., 2013)                              |
| CA-Obs  | FLX      | 01/2007 - 12/2010 | (Barr et al., 2012; Zha et al., 2013)                              |
| CA-Qcu  | LTH      | 01/2007 - 12/2010 | (Margolis, 2001)                                                   |
| CA-Qfo  | FLX      | 01/2007 - 12/2010 | (Bergeron et al., 2007)                                            |
| CH-Cha  | FLX      | 01/2007 - 12/2014 | (Eugster and Zeeman, 2006)                                         |
| CH-Dav  | FLX      | 01/2007 - 12/2014 | (Zweifel et al., 2010)                                             |
| CH-Fru  | FLX      | 01/2007 - 12/2014 | (Eugster and Zeeman, 2006)                                         |
| CH-Lae  | FLX      | 01/2007 - 12/2014 | (Eugster et al., 2007)                                             |
| CH-Oe2  | FLX      | 01/2007 - 12/2014 | (Kutsch et al., 2010)                                              |
| CZ-BK1  | FLX      | 01/2007 - 12/2014 | (Bernhofer et al., 2003)                                           |
| CZ-BK2  | FLX      | 01/2007 - 12/2012 | (Bernhofer et al., 2003)                                           |
| DE-Geb  | FLX      | 01/2007 - 12/2014 | (Anthoni et al., 2004a)                                            |
| DE-Lkb  | FLX      | 01/2009 - 12/2013 | (Westergaard-Nielsen et al., 2013)                                 |
| DE-Lnf  | FLX      | 01/2007 - 12/2012 | (Anthoni et al., 2004b)                                            |
| DE-Obe  | FLX      | 01/2008 - 12/2014 | (Westergaard-Nielsen et al., 2013)                                 |
| DE-She  | FLX      | 01/2007 - 12/2010 | (Eder et al., 2015)                                                |
| DE-Spw  | FLX      | 01/2010 - 12/2014 | (Westergaard-Nielsen et al., 2013)                                 |
| DE-Tha  | FLX      | 01/2007 - 12/2014 | (Bernhofer et al., 2003)                                           |
| ES-LgS  | FLX      | 01/2007 - 12/2009 | (Reverter et al., 2010)                                            |
| FI-Hyy  | FLX      | 01/2007 - 12/2014 | (Suni et al., 2003)                                                |
| FI-Lom  | FLX      | 01/2007 - 12/2009 | (Aurela et al., 2009; Lohila et al., 2010)                         |
| FR-Pue  | FLX      | 01/2007 - 12/2014 | (Rambal et al., 2004)                                              |
| IT-Col  | FLX      | 01/2007 - 12/2014 | (Valentini et al., 1996)                                           |
| IT-Lav  | FLX      | 01/2007 - 12/2014 | (Cescatti and Marcolla, 2004)                                      |
| IT-MBo  | FLX      | 01/2007 - 12/2013 | (Marcolla et al., 2011)                                            |
| IT-Ren  | FLX      | 01/2007 - 12/2013 | (Marcolla et al., 2005)                                            |
| RU-Tks  | FLX      | 01/2010 - 12/2014 | (Uttal et al., 2016)                                               |
| SD-Dem  | FLX      | 01/2007 - 12/2009 | (Ardo et al., 2008)                                                |
| SN-Dhr  | FLX      | 01/2010 - 12/2013 | (Tagesson et al., 2015)                                            |
| US-AR1  | FLX      | 01/2009 - 12/2012 | (Billesbach et al., 2016)                                          |
| US-AR2  | FLX      | 01/2009 - 12/2012 | (Billesbach et al., 2016)                                          |
| US-ARM  | FLX      | 01/2010 - 12/2014 | (Fischer et al., 2007)                                             |
| US-Bar  | LTH      | 01/2007 - 12/2011 | (Jenkins et al., 2007)                                             |
| US-Bkg  | LTH      | 01/2007 - 12/2010 | (Gilmanov et al., 2005)                                            |
| US-Fwf  | LTH      | 01/2007 - 12/2010 | (Dore et al., 2012)                                                |
| US-GLE  | FLX      | 01/2007 - 12/2014 | (Massman, 2000)                                                    |

|        |     |                   |                                                |
|--------|-----|-------------------|------------------------------------------------|
| US-Ha1 | FLX | 01/2007 - 12/2012 | (Urbanski et al., 2007)                        |
| US-Ha2 | LTH | 01/2007 - 12/2013 | (Urbanski et al., 2007)                        |
| US-IB1 | LTH | 01/2007 - 12/2011 | (Matamala et al., 2008)                        |
| US-ICb | LTH | 01/2007 - 12/2011 | (Euskirchen et al., 2012)                      |
| US-ICs | LTH | 01/2007 - 12/2011 | (Euskirchen et al., 2012)                      |
| US-ICt | LTH | 01/2007 - 12/2011 | (Euskirchen et al., 2012)                      |
| US-KFS | LTH | 01/2007 - 12/2012 | (Brunsell et al., 2014)                        |
| US-Kon | LTH | 01/2007 - 12/2012 | (Brunsell et al., 2008)                        |
| US-Me2 | FLX | 01/2007 - 12/2014 | (Kwon et al., 2017)                            |
| US-Me3 | FLX | 01/2007 - 12/2009 | (Kwon et al., 2017)                            |
| US-Me6 | FLX | 01/2010 - 12/2014 | (Kwon et al., 2017)                            |
| US-MMS | FLX | 01/2007 - 12/2014 | (Schmid et al., 2000)                          |
| US-MOz | LTH | 01/2007 - 12/2013 | (Gu et al., 2006)                              |
| US-Mpj | LTH | 01/2008 - 12/2010 | (Anderson-Teixeira et al., 2011)               |
| US-NC2 | LTH | 01/2007 - 12/2010 | (Noormets et al., 2010)                        |
| US-Ne1 | FLX | 01/2007 - 12/2013 | (Verma et al., 2005)                           |
| US-Ne2 | FLX | 01/2007 - 12/2013 | (Verma et al., 2005)                           |
| US-Ne3 | FLX | 01/2007 - 12/2013 | (Verma et al., 2005)                           |
| US-NR1 | FLX | 01/2007 - 12/2014 | (Monson et al., 2002)                          |
| US-Ro1 | LTH | 01/2007 - 12/2012 | (Griffis et al., 2007)                         |
| US-Seg | LTH | 01/2007 - 12/2010 | (Petrie et al., 2015)                          |
| US-Ses | LTH | 01/2007 - 12/2010 | (Petrie et al., 2015)                          |
| US-Slt | LTH | 01/2007 - 12/2012 | (Clark et al., 2010)                           |
| US-Snd | LTH | 01/2007 - 12/2014 | (Detto et al., 2010)                           |
| US-SP1 | LTH | 01/2007 - 12/2011 | (Gholz and Clark, 2002)                        |
| US-SP3 | LTH | 01/2007 - 12/2010 | (Gholz and Clark, 2002)                        |
| US-SRG | FLX | 01/2008 - 12/2014 | (Scott et al., 2015)                           |
| US-SRM | FLX | 01/2007 - 12/2014 | (Scott et al., 2009)                           |
| US-Sta | FLX | 01/2007 - 12/2009 | (Ewers and Pendall, 2009)                      |
| US-Ton | FLX | 01/2007 - 12/2014 | (Ma et al., 2007)                              |
| US-Twt | FLX | 01/2009 - 12/2014 | (Hatala et al., 2012)                          |
| US-Var | FLX | 01/2007 - 12/2014 | (Ma et al., 2007)                              |
| US-Vcm | LTH | 01/2007 - 12/2010 | (Anderson-Teixeira et al., 2011)               |
| US-Whs | FLX | 01/2007 - 12/2014 | (Wang et al., 2010)                            |
| US-Wjs | LTH | 01/2007 - 12/2010 | (Anderson-Teixeira et al., 2011)               |
| US-Wkg | FLX | 01/2007 - 12/2014 | (Scott et al., 2010)                           |
| US-Wrc | LTH | 01/2007 - 12/2014 | (Falk et al., 2008)                            |
| ZA-Kru | FLX | 01/2007 - 12/2013 | (Archibald et al., 2009; Scholes et al., 2001) |
| ZM-Mon | FLX | 01/2007 - 12/2009 | (Merbold et al., 2009)                         |

**Table S2: Statistics of WECANN LE retrievals compared to eddy covariance measurements.**

| Site ID | Correlation Coefficient |             |             |             | RMSE [W m <sup>-2</sup> ] |              |              |              | Bias [W m <sup>-2</sup> ] |               |               |               |
|---------|-------------------------|-------------|-------------|-------------|---------------------------|--------------|--------------|--------------|---------------------------|---------------|---------------|---------------|
|         | WECANN                  | FLUXNET-MTE | GLEAM       | ECMWF       | WECANN                    | FLUXNET-MTE  | GLEAM        | ECMWF        | WECANN                    | FLUXNET-MTE   | GLEAM         | ECMWF         |
| AT-Neu  | 0.92                    | 0.94        | 0.93        | <b>0.96</b> | 15.91                     | 15.95        | 14.08        | <b>10.19</b> | -4.00                     | -7.94         | <b>0.82</b>   | 0.54          |
| AU-ASM  | <b>0.81</b>             | 0.60        | 0.63        | 0.71        | <b>18.97</b>              | 25.53        | 25.41        | 23.54        | <b>-5.84</b>              | -23.30        | -9.65         | -9.41         |
| AU-Cpr  | <b>0.55</b>             | 0.24        | 0.39        | <b>0.54</b> | <b>14.04</b>              | 16.05        | 19.06        | 17.74        | <b>2.24</b>               | -8.87         | -4.31         | -2.98         |
| AU-DaP  | 0.80                    | 0.66        | 0.75        | <b>0.82</b> | 29.50                     | 34.96        | 31.27        | <b>28.15</b> | <b>-1.69</b>              | 3.10          | 7.34          | 3.50          |
| AU-DaS  | <b>0.90</b>             | 0.88        | <b>0.91</b> | 0.87        | 16.16                     | <b>15.76</b> | 17.82        | 18.29        | -21.37                    | -11.53        | -7.50         | <b>-4.25</b>  |
| AU-Dry  | <b>0.65</b>             | 0.60        | 0.60        | 0.62        | 31.41                     | <b>27.63</b> | 33.80        | 35.80        | -23.62                    | -15.60        | -4.46         | <b>1.42</b>   |
| AU-Stp  | <b>0.86</b>             | 0.66        | 0.63        | 0.61        | <b>20.41</b>              | 32.08        | 33.02        | 36.57        | <b>-1.95</b>              | -5.80         | 6.50          | 4.53          |
| AU-Tum  | <b>0.89</b>             | 0.78        | 0.64        | 0.68        | <b>21.39</b>              | 22.92        | 30.45        | 29.70        | -20.45                    | <b>-14.42</b> | -17.60        | -22.52        |
| AU-Wom  | <b>0.88</b>             | 0.81        | 0.77        | 0.64        | <b>15.63</b>              | 22.13        | 23.85        | 27.75        | -24.39                    | -28.17        | -26.02        | <b>-22.23</b> |
| BE-Bra  | <b>0.95</b>             | 0.78        | 0.80        | 0.79        | <b>9.04</b>               | 18.20        | 20.89        | 19.86        | 10.66                     | 14.02         | <b>9.46</b>   | 23.34         |
| BE-Lon  | <b>0.87</b>             | <b>0.87</b> | <b>0.86</b> | <b>0.87</b> | <b>16.03</b>              | 17.40        | 18.16        | 17.82        | 6.61                      | <b>-0.21</b>  | 3.15          | 14.69         |
| BE-Vie  | <b>0.94</b>             | 0.80        | 0.77        | 0.78        | <b>10.22</b>              | 20.16        | 23.01        | 24.03        | 10.76                     | <b>3.93</b>   | 6.42          | 16.30         |
| BR-Ji1  | 0.13                    | 0.09        | <b>0.65</b> | 0.13        | 16.67                     | 16.21        | <b>13.41</b> | 19.06        | 27.83                     | 29.08         | <b>15.52</b>  | 31.35         |
| BR-Ji2  | <b>0.77</b>             | <b>0.77</b> | 0.04        | 0.49        | 4.16                      | <b>2.93</b>  | 18.88        | 11.24        | 4.85                      | 5.32          | <b>-2.02</b>  | 10.14         |
| BR-Ma2  | -0.26                   | 0.17        | -0.11       | <b>0.45</b> | 13.33                     | <b>9.96</b>  | 14.01        | 13.65        | <b>7.71</b>               | 11.16         | 19.04         | 29.58         |
| BR-Sp1  | 0.84                    | <b>0.90</b> | 0.92        | <b>0.90</b> | 14.74                     | 12.50        | <b>11.10</b> | 12.70        | 7.63                      | <b>-0.69</b>  | 3.67          | 15.00         |
| CA-Qcu  | <b>0.97</b>             | 0.84        | 0.78        | 0.89        | <b>8.00</b>               | 15.67        | 23.77        | 13.89        | <b>1.48</b>               | <b>-1.64</b>  | 12.18         | 6.52          |
| CA-Qfo  | <b>0.98</b>             | 0.85        | 0.83        | 0.92        | <b>6.97</b>               | 12.87        | 22.93        | 12.30        | 8.52                      | <b>0.32</b>   | 18.24         | 10.98         |
| CH-Cha  | 0.91                    | 0.84        | 0.91        | <b>0.93</b> | 20.68                     | 23.04        | 16.38        | <b>14.82</b> | -15.29                    | -22.95        | -11.56        | <b>-6.69</b>  |
| CH-Dav  | <b>0.95</b>             | 0.84        | 0.85        | 0.91        | <b>16.43</b>              | 21.06        | 21.58        | <b>16.43</b> | -21.63                    | <b>-17.18</b> | <b>-17.19</b> | -21.76        |
| CH-Fru  | <b>0.93</b>             | 0.79        | 0.86        | 0.88        | <b>16.66</b>              | 25.34        | 19.38        | 18.46        | -9.05                     | -19.93        | -7.09         | <b>-2.84</b>  |
| DE-Geb  | <b>0.89</b>             | 0.87        | 0.85        | 0.83        | <b>14.85</b>              | 16.00        | 17.02        | 19.52        | 10.81                     | <b>6.13</b>   | 12.35         | 18.65         |
| DE-Lkb  | <b>0.90</b>             | <b>0.89</b> | 0.87        | 0.88        | 14.49                     | <b>13.80</b> | 17.64        | 18.42        | 11.71                     | <b>5.74</b>   | 9.82          | 15.73         |
| DE-Lnf  | <b>0.96</b>             | 0.85        | 0.86        | 0.85        | <b>9.51</b>               | 17.22        | 17.45        | 18.19        | 8.92                      | <b>4.63</b>   | 6.81          | 13.58         |
| DE-Obe  | <b>0.94</b>             | 0.89        | 0.85        | 0.87        | <b>10.84</b>              | 14.45        | 18.27        | 18.29        | 5.28                      | <b>1.78</b>   | 3.32          | 13.22         |
| DE-Seh  | 0.78                    | 0.81        | 0.81        | <b>0.89</b> | 20.13                     | <b>18.15</b> | 19.36        | <b>18.39</b> | 3.42                      | <b>-1.08</b>  | 2.59          | 17.80         |
| DE-Tha  | <b>0.96</b>             | 0.87        | 0.88        | 0.90        | <b>9.13</b>               | 14.38        | 16.20        | 16.64        | 5.29                      | 3.30          | <b>2.82</b>   | 11.74         |
| ES-LgS  | <b>0.74</b>             | 0.61        | -0.03       | 0.10        | <b>14.80</b>              | 17.46        | 26.00        | 27.65        | <b>-1.94</b>              | -8.91         | -18.94        | -4.42         |
| FI-Hyy  | <b>0.97</b>             | 0.90        | 0.82        | 0.88        | <b>6.48</b>               | 12.23        | 18.55        | 16.15        | 1.09                      | <b>-0.49</b>  | 4.47          | 7.95          |
| FI-Lom  | <b>0.89</b>             | <b>0.90</b> | 0.83        | <b>0.89</b> | 11.44                     | <b>10.93</b> | 16.85        | <b>10.83</b> | 8.52                      | <b>6.90</b>   | 9.69          | 9.56          |
| FR-Pue  | <b>0.84</b>             | 0.82        | <b>0.84</b> | 0.79        | 16.57                     | <b>14.92</b> | 18.04        | 18.46        | 8.55                      | <b>0.83</b>   | 3.13          | 14.99         |
| IT-Col  | <b>0.87</b>             | 0.70        | 0.43        | 0.55        | <b>24.05</b>              | 26.34        | 42.88        | 36.63        | 4.27                      | 7.03          | <b>3.07</b>   | <b>-2.70</b>  |
| IT-Lav  | <b>0.94</b>             | 0.89        | 0.84        | 0.86        | <b>13.73</b>              | <b>13.91</b> | 18.52        | 21.73        | <b>4.07</b>               | -5.12         | -6.71         | 6.52          |
| IT-MBo  | <b>0.95</b>             | 0.86        | 0.80        | 0.88        | <b>15.01</b>              | 22.04        | 24.19        | 19.20        | -2.82                     | -9.41         | 0.66          | <b>0.60</b>   |
| IT-Ren  | <b>0.94</b>             | 0.72        | 0.87        | 0.91        | <b>11.18</b>              | 21.65        | 16.78        | 15.01        | 1.80                      | 5.02          | 7.40          | 6.90          |
| RU-Tks  | <b>0.51</b>             | 0.32        | 0.31        | 0.37        | <b>19.22</b>              | 23.95        | 27.18        | 24.15        | <b>0.12</b>               | -3.32         | -3.81         | 6.22          |
| SD-Dem  | <b>0.73</b>             | 0.52        | 0.66        | 0.82        | 20.60                     | 25.78        | 24.82        | <b>18.77</b> | -17.40                    | -29.93        | -22.50        | <b>-14.64</b> |
| SN-Dhr  | <b>0.36</b>             | 0.26        | 0.27        | 0.26        | <b>47.17</b>              | <b>46.83</b> | 49.76        | 48.53        | <b>-21.13</b>             | -50.71        | -50.48        | -58.92        |
| US-AR1  | <b>0.82</b>             | 0.77        | 0.70        | 0.52        | <b>17.42</b>              | 18.45        | 20.49        | 25.70        | <b>-3.09</b>              | -5.36         | -6.01         | -3.66         |
| US-AR2  | 0.52                    | <b>0.58</b> | 0.54        | 0.37        | 23.49                     | <b>21.98</b> | <b>22.02</b> | 25.79        | 3.14                      | <b>-0.74</b>  | -1.39         | 0.96          |
| US-ARM  | 0.76                    | <b>0.82</b> | 0.81        | 0.71        | 22.47                     | <b>17.94</b> | 22.41        | 25.07        | 3.29                      | <b>-0.16</b>  | 1.39          | 4.57          |
| US-Bar  | <b>0.92</b>             | 0.88        | 0.81        | 0.82        | <b>13.80</b>              | 15.96        | 22.23        | 25.30        | 20.47                     | <b>6.66</b>   | 11.36         | 24.25         |
| US-Bkg  | <b>0.89</b>             | 0.87        | 0.77        | 0.77        | <b>22.72</b>              | 23.98        | 31.28        | 30.82        | -11.84                    | -17.43        | -16.71        | <b>8.67</b>   |
| US-Fwf  | <b>0.85</b>             | 0.72        | 0.65        | 0.30        | <b>15.38</b>              | <b>15.73</b> | 16.80        | 21.56        | -9.24                     | -10.65        | <b>-7.82</b>  | -9.68         |
| US-GLE  | <b>0.79</b>             | 0.71        | 0.68        | 0.55        | <b>13.55</b>              | 16.72        | 22.03        | 21.37        | -17.33                    | -23.13        | <b>-11.74</b> | -12.73        |
| US-Ha2  | 0.78                    | 0.79        | 0.75        | <b>0.88</b> | <b>22.60</b>              | <b>22.32</b> | 24.46        | 25.42        | 26.32                     | 11.73         | <b>9.68</b>   | 29.94         |
| US-IB1  | <b>0.92</b>             | 0.86        | 0.77        | 0.72        | <b>16.80</b>              | 20.81        | 28.86        | 35.96        | <b>0.24</b>               | -10.40        | -6.06         | 9.62          |
| US-ICb  | <b>0.93</b>             | 0.83        | 0.81        | 0.84        | <b>8.36</b>               | 12.53        | 13.16        | 13.09        | -3.09                     | <b>-0.93</b>  | -3.52         | <b>-1.35</b>  |
| US-ICs  | <b>0.94</b>             | 0.83        | 0.80        | 0.85        | <b>8.58</b>               | 13.32        | 14.56        | 13.19        | -4.25                     | <b>-1.40</b>  | -4.29         | <b>-1.54</b>  |
| US-ICt  | <b>0.92</b>             | 0.82        | 0.75        | 0.83        | <b>9.08</b>               | 13.45        | 15.93        | 13.62        | <b>-0.36</b>              | -1.53         | -5.34         | -1.24         |
| US-KFS  | <b>0.93</b>             | <b>0.93</b> | 0.88        | 0.74        | <b>15.35</b>              | 20.47        | 21.66        | 31.91        | 11.46                     | 8.27          | <b>4.39</b>   | 20.78         |
| US-Kon  | <b>0.87</b>             | <b>0.88</b> | 0.82        | 0.67        | <b>22.64</b>              | <b>22.47</b> | 26.77        | 37.48        | 4.18                      | <b>1.79</b>   | <b>1.80</b>   | 12.88         |
| US-Me2  | <b>0.89</b>             | 0.87        | 0.77        | 0.62        | <b>13.89</b>              | 15.25        | 18.43        | 23.27        | -8.50                     | -11.82        | <b>-3.11</b>  | -7.61         |

|         |             |             |             |             |              |              |              |              |               |              |               |              |
|---------|-------------|-------------|-------------|-------------|--------------|--------------|--------------|--------------|---------------|--------------|---------------|--------------|
| US-MMS  | 0.95        | 0.91        | 0.88        | 0.75        | <b>15.58</b> | 22.72        | 24.15        | 34.48        | 11.41         | <b>-2.20</b> | <b>-1.99</b>  | 18.33        |
| US-MOz  | <b>0.90</b> | 0.86        | 0.85        | 0.72        | <b>17.49</b> | 22.13        | 23.25        | 33.78        | 16.49         | <b>1.63</b>  | 4.43          | 13.55        |
| US-Mpj  | <b>0.85</b> | 0.58        | 0.60        | 0.39        | <b>9.14</b>  | 13.44        | 15.26        | 17.92        | <b>-5.43</b>  | -10.14       | -7.46         | -7.27        |
| US-NC2  | <b>0.95</b> | 0.91        | 0.83        | 0.85        | <b>10.88</b> | 15.31        | 26.17        | 19.69        | -23.05        | -14.21       | <b>2.27</b>   | 14.90        |
| US-Ne1  | 0.84        | <b>0.90</b> | 0.85        | 0.65        | 36.45        | <b>25.64</b> | 31.10        | 45.26        | -26.85        | -14.45       | -23.10        | <b>-9.08</b> |
| US-Ne2  | 0.80        | <b>0.84</b> | 0.80        | 0.60        | 38.38        | <b>29.96</b> | 32.92        | 46.33        | -22.08        | -12.19       | -14.52        | <b>-0.26</b> |
| US-Ne3  | <b>0.86</b> | 0.80        | 0.80        | 0.60        | <b>25.89</b> | 30.72        | 30.37        | 45.03        | <b>-6.30</b>  | <b>-6.42</b> | -7.51         | <b>6.52</b>  |
| US-NR1  | <b>0.89</b> | 0.78        | 0.71        | 0.71        | <b>13.65</b> | 16.82        | 21.77        | 19.87        | -24.68        | -19.77       | <b>-13.74</b> | -17.48       |
| US-Ro1  | <b>0.93</b> | 0.87        | 0.79        | 0.77        | <b>15.12</b> | 18.67        | 24.95        | 31.81        | 5.68          | <b>0.66</b>  | 2.52          | 20.51        |
| US-Seg  | <b>0.85</b> | 0.76        | 0.72        | 0.65        | <b>8.55</b>  | 10.84        | 12.54        | 12.77        | 4.05          | -2.17        | <b>1.19</b>   | 2.36         |
| US-Ses  | <b>0.85</b> | 0.74        | 0.75        | 0.66        | <b>8.05</b>  | 10.40        | 11.66        | 12.76        | 5.38          | <b>-0.94</b> | 2.42          | 3.15         |
| US-Slt  | <b>0.86</b> | 0.83        | 0.76        | 0.81        | <b>22.42</b> | 27.92        | 29.99        | 25.54        | <b>-3.62</b>  | -4.42        | 9.87          | 10.35        |
| US-Snd  | <b>0.76</b> | 0.72        | 0.36        | 0.35        | <b>17.72</b> | <b>17.71</b> | 29.52        | 29.09        | <b>-16.66</b> | -27.13       | -39.45        | -21.81       |
| US-SP1  | <b>0.69</b> | 0.49        | 0.55        | 0.60        | <b>24.29</b> | 31.76        | 29.79        | 28.80        | 20.10         | <b>16.04</b> | 24.32         | 28.23        |
| US-SP3  | 0.68        | 0.66        | 0.69        | <b>0.71</b> | 31.33        | <b>25.37</b> | 31.18        | 31.76        | 8.62          | <b>3.55</b>  | 11.93         | 9.75         |
| US-SRG  | <b>0.90</b> | 0.84        | 0.81        | 0.71        | <b>13.87</b> | 19.90        | 17.55        | 21.53        | -7.06         | -12.03       | <b>-4.91</b>  | -13.81       |
| US-SRM  | <b>0.87</b> | 0.82        | 0.83        | 0.67        | <b>12.30</b> | 15.47        | 14.99        | 20.08        | <b>-0.77</b>  | -4.08        | <b>0.92</b>   | -8.53        |
| US-Ton  | 0.55        | 0.66        | <b>0.93</b> | 0.88        | 23.84        | 23.37        | <b>11.35</b> | 14.29        | 11.77         | 13.49        | 8.54          | <b>2.31</b>  |
| US-Twt  | <b>0.77</b> | 0.48        | -0.21       | -0.22       | <b>51.52</b> | 64.12        | 82.10        | 81.42        | <b>-42.74</b> | -50.52       | -60.37        | -43.69       |
| US-Var  | 0.16        | 0.36        | 0.84        | <b>0.90</b> | 36.06        | 30.52        | <b>17.25</b> | <b>16.73</b> | 17.89         | 24.10        | <b>15.84</b>  | 8.19         |
| US-Vcm  | <b>0.83</b> | 0.77        | 0.63        | 0.40        | <b>15.70</b> | 19.68        | 20.65        | 25.45        | <b>-16.43</b> | -21.40       | -20.54        | -17.10       |
| US-Whs  | <b>0.84</b> | <b>0.83</b> | <b>0.84</b> | 0.68        | <b>11.61</b> | 12.50        | 13.22        | 16.53        | 6.09          | 2.37         | 8.87          | <b>-0.40</b> |
| US-Wjs  | <b>0.89</b> | 0.81        | 0.80        | 0.76        | <b>9.72</b>  | 12.52        | 12.93        | 12.85        | -4.64         | -8.83        | -3.85         | <b>0.97</b>  |
| US-Wkg  | <b>0.81</b> | 0.74        | 0.79        | 0.61        | <b>14.69</b> | 15.18        | 15.19        | 19.78        | 1.16          | <b>-0.03</b> | 2.24          | -3.31        |
| US-Wrc  | 0.69        | <b>0.75</b> | 0.49        | 0.33        | 17.22        | <b>15.59</b> | 24.17        | 24.27        | 23.54         | <b>6.21</b>  | 27.67         | 20.13        |
| ZA-Kru  | 0.50        | <b>0.69</b> | 0.59        | 0.65        | 39.37        | <b>28.84</b> | 30.30        | 31.98        | -2.94         | 14.75        | <b>-1.71</b>  | 17.95        |
| ZM-Mon  | 0.54        | 0.29        | <b>0.62</b> | 0.57        | 33.85        | 42.48        | <b>30.80</b> | 34.88        | 6.63          | 24.24        | <b>-2.60</b>  | 8.48         |
| Average | <b>0.80</b> | 0.74        | 0.70        | 0.69        | <b>17.95</b> | 20.37        | 22.85        | 23.91        | <b>-1.04</b>  | -4.22        | -1.97         | 3.18         |

**Table S3: Similar to Table S1, but for WECANN H retrievals.**

| Site ID | Correlation Coefficient |             |             |             | RMSE [ $W\ m^{-2}$ ] |              |              |              | Bias [ $W\ m^{-2}$ ] |               |              |               |
|---------|-------------------------|-------------|-------------|-------------|----------------------|--------------|--------------|--------------|----------------------|---------------|--------------|---------------|
|         | WECANN                  | FLUXNET-MTE | GLEAM       | ECMWF       | WECANN               | FLUXNET-MTE  | GLEAM        | ECMWF        | WECANN               | FLUXNET-MTE   | GLEAM        | ECMWF         |
| AT-Neu  | <b>0.86</b>             | 0.78        | 0.71        | 0.73        | <b>6.92</b>          | 17.45        | 12.56        | 10.62        | 17.37                | 34.30         | <b>7.44</b>  | 9.29          |
| AU-ASM  | 0.74                    | 0.10        | 0.64        | <b>0.81</b> | 18.09                | 25.74        | 18.30        | <b>16.21</b> | -38.40               | -60.13        | -41.78       | <b>-22.69</b> |
| AU-Cpr  | <b>0.73</b>             | <b>0.74</b> | 0.49        | 0.53        | 29.02                | <b>26.60</b> | 31.16        | 37.02        | -12.33               | -24.72        | -18.29       | <b>-0.89</b>  |
| AU-DaP  | 0.65                    | -0.75       | 0.73        | <b>0.83</b> | 25.55                | 60.95        | 21.51        | <b>19.42</b> | -4.27                | -5.01         | -9.44        | <b>-1.59</b>  |
| AU-DaS  | 0.75                    | -0.38       | <b>0.80</b> | 0.76        | <b>13.90</b>         | 42.84        | 15.27        | 17.82        | 5.06                 | 4.80          | <b>0.79</b>  | 5.39          |
| AU-Dry  | <b>0.58</b>             | -0.10       | 0.49        | 0.50        | <b>22.32</b>         | 40.84        | 26.68        | 29.54        | <b>-4.62</b>         | -19.76        | -10.55       | -10.10        |
| AU-Stp  | 0.66                    | -0.34       | 0.60        | <b>0.69</b> | <b>14.86</b>         | 32.39        | 16.65        | 18.37        | -6.56                | -29.90        | <b>2.00</b>  | 7.69          |
| AU-Tum  | 0.73                    | 0.85        | 0.67        | <b>0.85</b> | 18.31                | <b>13.52</b> | 19.61        | 19.41        | <b>2.35</b>          | 11.22         | -11.35       | 19.37         |
| AU-Wom  | <b>0.87</b>             | <b>0.86</b> | 0.63        | 0.84        | 21.72                | <b>19.49</b> | 27.67        | 20.98        | <b>3.67</b>          | 22.87         | -6.29        | 8.69          |
| BE-Bra  | 0.86                    | 0.78        | 0.78        | <b>0.90</b> | 17.89                | 18.97        | 22.51        | <b>15.06</b> | <b>-9.11</b>         | 18.71         | -21.85       | -28.21        |
| BE-Lon  | <b>0.77</b>             | 0.67        | 0.52        | 0.68        | <b>13.83</b>         | 22.12        | 18.09        | 16.09        | 5.29                 | 30.41         | <b>-4.18</b> | -8.29         |
| BE-Vie  | 0.87                    | <b>0.89</b> | 0.76        | 0.81        | 17.89                | <b>13.48</b> | 21.40        | 21.29        | -13.92               | <b>9.08</b>   | -27.22       | -31.23        |
| BR-Ji1  | 0.29                    | 0.42        | <b>0.57</b> | 0.45        | 9.27                 | <b>5.67</b>  | 10.09        | 9.27         | <b>-4.88</b>         | -7.66         | -5.70        | -11.56        |
| BR-Ji2  | 0.83                    | 0.64        | 0.51        | <b>0.85</b> | 4.79                 | <b>3.57</b>  | 14.10        | 8.09         | 7.00                 | 4.28          | 7.92         | <b>3.02</b>   |
| BR-Ma2  | <b>0.84</b>             | 0.77        | 0.71        | -0.07       | <b>3.18</b>          | <b>3.52</b>  | 10.17        | 5.77         | <b>1.76</b>          | -6.15         | -8.86        | -13.97        |
| BR-Sp1  | <b>0.92</b>             | 0.69        | 0.70        | 0.83        | <b>5.31</b>          | 8.40         | 7.99         | 7.43         | 4.05                 | 12.42         | -3.47        | <b>-1.50</b>  |
| CA-Qcu  | <b>0.89</b>             | <b>0.89</b> | 0.54        | 0.75        | <b>9.22</b>          | 10.77        | 19.73        | 19.60        | 9.54                 | 12.77         | <b>-8.76</b> | 10.87         |
| CA-Qfo  | 0.83                    | 0.80        | <b>0.89</b> | <b>0.90</b> | 23.35                | 22.08        | 23.64        | <b>16.08</b> | -17.06               | <b>-14.45</b> | -34.42       | -15.95        |
| CH-Cha  | <b>0.81</b>             | 0.76        | 0.74        | 0.72        | <b>7.26</b>          | 20.60        | 11.71        | 9.88         | 6.73                 | 28.31         | <b>0.76</b>  | -2.70         |
| CH-Dav  | 0.75                    | <b>0.82</b> | 0.73        | 0.73        | 19.43                | 18.27        | <b>17.64</b> | <b>17.61</b> | <b>-0.55</b>         | 5.14          | 2.46         | -5.21         |
| CH-Fru  | <b>0.87</b>             | 0.73        | 0.62        | 0.66        | <b>8.11</b>          | 18.45        | 14.37        | 12.32        | 8.39                 | 30.25         | <b>1.35</b>  | -2.17         |
| DE-Geb  | <b>0.86</b>             | 0.72        | 0.63        | 0.77        | <b>10.80</b>         | 20.54        | 16.97        | 13.26        | <b>1.80</b>          | 23.08         | -10.21       | -7.93         |
| DE-Lkb  | 0.82                    | <b>0.85</b> | 0.59        | 0.71        | <b>14.89</b>         | 15.81        | 19.62        | 17.45        | <b>-7.72</b>         | <b>8.21</b>   | -18.50       | -19.94        |
| DE-Lnf  | 0.25                    | 0.26        | 0.14        | <b>0.29</b> | 36.73                | 39.83        | 41.31        | <b>33.23</b> | 15.32                | 29.01         | 11.99        | <b>2.09</b>   |
| DE-Obe  | 0.82                    | <b>0.93</b> | 0.69        | 0.85        | 16.05                | <b>11.39</b> | 17.98        | 13.79        | -8.54                | <b>7.60</b>   | -19.99       | -22.89        |
| DE-Seh  | 0.53                    | 0.48        | 0.37        | <b>0.58</b> | <b>13.26</b>         | 26.04        | 16.75        | 14.04        | 13.70                | 33.68         | <b>0.62</b>  | -1.77         |
| DE-Tha  | <b>0.92</b>             | <b>0.92</b> | 0.70        | 0.88        | 20.92                | <b>11.74</b> | 25.21        | 19.65        | -11.99               | <b>7.11</b>   | -23.80       | -25.31        |
| ES-LgS  | <b>0.87</b>             | 0.61        | 0.77        | 0.82        | <b>26.47</b>         | 45.19        | 32.45        | 31.76        | <b>1.26</b>          | -22.96        | 5.01         | 16.79         |
| FI-Hyy  | 0.83                    | 0.91        | 0.87        | <b>0.93</b> | 16.67                | <b>12.74</b> | 16.64        | <b>12.46</b> | <b>-0.45</b>         | 5.85          | -9.37        | -14.34        |
| FI-Lom  | <b>0.85</b>             | <b>0.84</b> | 0.65        | 0.72        | <b>10.74</b>         | 13.24        | 16.96        | 18.45        | 8.73                 | 14.68         | 1.34         | <b>-0.53</b>  |
| FR-Pue  | <b>0.93</b>             | 0.86        | 0.88        | 0.91        | 21.70                | 30.43        | 23.05        | <b>17.56</b> | -5.64                | <b>2.92</b>   | -9.24        | -6.27         |
| IT-Col  | 0.77                    | 0.65        | 0.60        | <b>0.87</b> | 20.89                | 26.81        | 26.03        | <b>16.95</b> | -15.20               | <b>-0.67</b>  | -16.32       | -1.27         |
| IT-Lav  | <b>0.95</b>             | 0.93        | 0.91        | 0.85        | 27.07                | <b>17.59</b> | 26.99        | 32.92        | -23.03               | <b>-0.07</b>  | -11.43       | -31.34        |
| IT-MBo  | <b>0.84</b>             | 0.79        | 0.52        | 0.65        | <b>15.47</b>         | 17.10        | 22.30        | 19.25        | 16.23                | 29.61         | 24.80        | <b>12.01</b>  |
| IT-Ren  | <b>0.91</b>             | 0.68        | 0.83        | 0.88        | <b>20.17</b>         | 23.52        | 21.81        | 21.85        | -24.96               | <b>-3.60</b>  | -18.27       | -33.91        |
| RU-Tks  | <b>0.63</b>             | 0.37        | 0.38        | 0.34        | <b>17.46</b>         | 25.85        | 34.28        | 28.15        | 14.20                | <b>2.96</b>   | -6.52        | -8.02         |
| SD-Dem  | <b>0.64</b>             | -0.48       | 0.56        | 0.54        | <b>10.84</b>         | 21.06        | 14.80        | 12.25        | 4.21                 | -37.00        | <b>-2.45</b> | 8.23          |
| SN-Dhr  | 0.60                    | -0.81       | <b>0.68</b> | 0.49        | <b>18.18</b>         | 43.62        | 20.13        | 24.53        | 30.43                | <b>-6.25</b>  | 15.27        | 41.01         |
| US-AR1  | <b>0.86</b>             | 0.36        | 0.74        | 0.78        | <b>12.74</b>         | 27.15        | 15.92        | 22.27        | 12.19                | <b>1.35</b>   | 3.49         | 18.60         |
| US-AR2  | 0.63                    | 0.48        | 0.72        | <b>0.75</b> | 20.51                | 24.05        | <b>15.69</b> | 23.55        | 3.21                 | -3.17         | <b>-1.03</b> | 14.08         |
| US-ARM  | <b>0.78</b>             | 0.55        | 0.61        | 0.72        | 22.93                | 28.42        | 24.15        | <b>22.35</b> | <b>-3.73</b>         | 11.33         | -15.45       | <b>-3.17</b>  |
| US-Bar  | <b>0.81</b>             | 0.55        | <b>0.81</b> | 0.77        | 22.65                | 29.88        | <b>20.91</b> | <b>21.31</b> | -12.33               | <b>1.10</b>   | -12.60       | -20.66        |
| US-Bkg  | 0.68                    | 0.32        | 0.70        | <b>0.77</b> | 14.78                | 37.83        | <b>12.50</b> | <b>12.33</b> | <b>1.35</b>          | 25.79         | <b>-1.45</b> | -7.15         |
| US-Fwf  | <b>0.83</b>             | 0.50        | 0.77        | <b>0.82</b> | <b>22.22</b>         | 32.43        | 25.33        | 23.89        | 24.42                | <b>-9.23</b>  | 13.97        | 36.08         |
| US-GLE  | 0.83                    | 0.84        | 0.82        | <b>0.92</b> | 23.81                | 23.73        | 27.52        | <b>15.99</b> | <b>-5.50</b>         | -12.95        | -26.83       | -6.50         |
| US-Ha2  | <b>0.86</b>             | 0.79        | 0.83        | 0.46        | 14.03                | 23.12        | <b>13.09</b> | 22.04        | -5.76                | 15.63         | <b>3.92</b>  | -12.98        |
| US-IB1  | <b>0.87</b>             | 0.45        | 0.37        | 0.24        | <b>9.50</b>          | 30.17        | 17.60        | 20.45        | 7.23                 | 24.39         | -5.72        | <b>-4.99</b>  |
| US-ICH  | <b>0.87</b>             | 0.80        | 0.71        | 0.81        | <b>12.02</b>         | 13.25        | 18.34        | <b>12.37</b> | 23.78                | 15.93         | 9.09         | <b>6.12</b>   |
| US-ICs  | <b>0.83</b>             | 0.77        | 0.73        | 0.80        | <b>13.11</b>         | 14.15        | 17.74        | 12.55        | 25.86                | 17.38         | 10.14        | <b>7.55</b>   |
| US-ICt  | <b>0.87</b>             | 0.76        | 0.70        | 0.78        | <b>11.60</b>         | 15.21        | 17.69        | 12.57        | 10.12                | 5.88          | <b>2.32</b>  | -4.26         |
| US-KFS  | <b>0.88</b>             | 0.62        | 0.52        | 0.43        | <b>6.17</b>          | 43.66        | 9.38         | 15.94        | <b>1.65</b>          | 34.36         | -7.71        | -3.98         |

|         |             |             |             |             |              |              |              |              |               |              |               |               |
|---------|-------------|-------------|-------------|-------------|--------------|--------------|--------------|--------------|---------------|--------------|---------------|---------------|
| US-Kon  | 0.53        | -0.16       | <b>0.61</b> | -0.10       | 13.74        | 49.91        | <b>10.90</b> | 26.08        | <b>-0.79</b>  | 26.83        | -10.04        | -4.09         |
| US-Me2  | <b>0.92</b> | 0.87        | <b>0.91</b> | <b>0.92</b> | 21.65        | 33.33        | <b>18.97</b> | <b>18.65</b> | -9.08         | -13.89       | -14.65        | <b>2.49</b>   |
| US-MMS  | 0.66        | 0.27        | <b>0.72</b> | -0.03       | 16.17        | 37.09        | <b>13.01</b> | 22.42        | -13.32        | 19.25        | <b>-11.22</b> | -15.85        |
| US-MOz  | <b>0.69</b> | 0.21        | 0.66        | -0.14       | 14.12        | 37.64        | <b>12.37</b> | 24.56        | -9.96         | 21.04        | -10.16        | <b>0.28</b>   |
| US-Mpj  | <b>0.95</b> | 0.77        | 0.77        | 0.88        | <b>17.52</b> | 31.57        | 25.15        | 18.55        | -29.72        | -58.75       | -37.50        | <b>-22.50</b> |
| US-NC2  | 0.73        | 0.54        | 0.19        | <b>0.86</b> | 17.66        | 25.97        | <b>15.94</b> | <b>15.88</b> | 17.41         | 36.46        | -11.02        | <b>-3.55</b>  |
| US-Ne1  | 0.51        | -0.07       | <b>0.66</b> | 0.07        | 19.90        | 54.54        | <b>15.87</b> | 25.55        | 3.22          | 27.07        | -5.25         | <b>-1.96</b>  |
| US-Ne2  | 0.58        | 0.03        | <b>0.68</b> | 0.13        | 18.15        | 52.78        | <b>17.02</b> | 25.85        | <b>2.87</b>   | 24.94        | -8.36         | -5.19         |
| US-Ne3  | <b>0.69</b> | 0.22        | 0.61        | 0.16        | <b>17.55</b> | 47.02        | 19.37        | 27.34        | <b>-4.41</b>  | 24.43        | -9.83         | -5.82         |
| US-NR1  | 0.68        | 0.78        | 0.83        | <b>0.90</b> | 23.92        | <b>19.57</b> | 20.96        | 15.73        | -9.26         | -15.22       | -26.46        | <b>-0.66</b>  |
| US-Ro1  | <b>0.84</b> | 0.63        | 0.42        | 0.33        | <b>9.35</b>  | 27.64        | 16.87        | 18.35        | 8.12          | 27.42        | <b>-0.28</b>  | -1.14         |
| US-Seg  | <b>0.87</b> | 0.73        | 0.78        | <b>0.88</b> | <b>12.32</b> | 18.74        | 15.90        | 14.85        | -10.82        | -37.01       | -16.85        | <b>-0.33</b>  |
| US-Ses  | <b>0.92</b> | 0.74        | 0.82        | <b>0.92</b> | <b>9.32</b>  | 17.57        | 14.08        | 13.14        | -13.86        | -41.03       | -20.87        | <b>-6.25</b>  |
| US-Slt  | 0.67        | 0.61        | 0.61        | <b>0.80</b> | 20.49        | 27.16        | 21.56        | <b>16.79</b> | <b>-6.13</b>  | 1.79         | -25.42        | -8.51         |
| US-Snd  | <b>0.51</b> | 0.28        | 0.47        | 0.48        | 24.99        | <b>21.24</b> | 32.26        | 39.40        | 11.37         | <b>8.14</b>  | 19.67         | 11.49         |
| US-SP1  | <b>0.59</b> | 0.42        | 0.36        | 0.49        | <b>14.85</b> | 34.59        | 18.53        | 22.56        | 4.99          | 26.39        | -4.77         | <b>1.47</b>   |
| US-SP3  | 0.60        | <b>0.63</b> | 0.42        | 0.32        | <b>20.46</b> | 21.46        | 22.17        | 27.81        | <b>-16.77</b> | 28.77        | -26.25        | -19.09        |
| US-SRG  | <b>0.88</b> | 0.02        | 0.86        | <b>0.88</b> | <b>13.80</b> | 30.95        | 14.80        | 18.01        | 6.06          | -25.52       | <b>0.81</b>   | 28.58         |
| US-SRM  | <b>0.90</b> | 0.14        | 0.84        | <b>0.91</b> | 16.12        | 35.42        | 18.58        | <b>14.89</b> | -15.69        | -45.40       | -24.23        | <b>5.57</b>   |
| US-Ton  | <b>0.96</b> | 0.71        | 0.93        | 0.92        | 21.37        | 32.48        | <b>18.21</b> | 20.85        | -24.53        | -16.90       | -19.37        | <b>-2.64</b>  |
| US-Twt  | -0.38       | <b>0.14</b> | -0.37       | -0.32       | 51.06        | <b>39.17</b> | 59.14        | 64.13        | 34.92         | <b>32.81</b> | 41.27         | 31.95         |
| US-Var  | <b>0.91</b> | 0.70        | <b>0.90</b> | <b>0.89</b> | 26.79        | 31.62        | <b>21.41</b> | 23.72        | -15.70        | 1.82         | -13.08        | <b>-0.39</b>  |
| US-Vcm  | 0.84        | 0.81        | 0.82        | <b>0.86</b> | <b>15.40</b> | 21.01        | 16.33        | 17.41        | -19.02        | -41.44       | -22.73        | <b>-11.32</b> |
| US-Whs  | 0.88        | 0.12        | 0.78        | <b>0.92</b> | 15.11        | 31.22        | 18.94        | <b>14.46</b> | -16.79        | -49.19       | -26.28        | <b>6.04</b>   |
| US-Wjs  | 0.89        | 0.65        | 0.80        | <b>0.94</b> | 14.04        | 24.21        | 17.88        | <b>10.76</b> | <b>-17.76</b> | -45.40       | -26.97        | <b>-17.24</b> |
| US-Wkg  | <b>0.90</b> | 0.32        | 0.80        | 0.88        | <b>12.95</b> | 27.12        | 18.10        | 16.34        | <b>-3.36</b>  | -38.27       | -10.84        | 12.36         |
| US-Wrc  | 0.90        | 0.80        | 0.85        | <b>0.92</b> | 21.60        | 27.94        | 21.71        | <b>19.22</b> | <b>-2.98</b>  | <b>2.73</b>  | -16.65        | 8.98          |
| ZA-Kru  | <b>0.59</b> | 0.17        | 0.47        | <b>0.59</b> | <b>13.25</b> | 32.70        | 20.21        | 17.24        | -13.57        | <b>-1.73</b> | -16.87        | -11.31        |
| ZM-Mon  | 0.26        | -0.14       | 0.39        | <b>0.49</b> | 23.10        | 44.61        | 21.91        | <b>18.74</b> | -15.84        | -6.40        | -15.41        | <b>-4.98</b>  |
| Average | <b>0.75</b> | 0.50        | 0.65        | 0.66        | <b>17.14</b> | 26.59        | 19.85        | 19.53        | <b>-1.63</b>  | 1.91         | -8.42         | -2.50         |

**Table S4: Similar to Table S1, but for WECANN GPP retrievals**

| Site ID | Correlation Coefficient |             |             |             | RMSE [ $\text{gC m}^{-2} \text{day}^{-1}$ ] |             |             |             | Bias [ $\text{gC m}^{-2} \text{day}^{-1}$ ] |              |              |              |
|---------|-------------------------|-------------|-------------|-------------|---------------------------------------------|-------------|-------------|-------------|---------------------------------------------|--------------|--------------|--------------|
|         | WECANN                  | FLUXNET-MTE | MODIS       | ECMWF       | WECANN                                      | FLUXNET-MTE | MODIS       | ECMWF       | WECANN                                      | FLUXNET-MTE  | MODIS        | ECMWF        |
| AT-Neu  | 0.81                    | 0.92        | 0.92        | <b>0.94</b> | 1.55                                        | <b>1.00</b> | <b>1.08</b> | <b>1.03</b> | -0.66                                       | <b>0.16</b>  | -0.37        | -0.91        |
| AU-ASM  | 0.68                    | 0.52        | 0.11        | <b>0.71</b> | <b>0.47</b>                                 | <b>0.48</b> | 0.55        | 0.53        | 0.62                                        | <b>0.22</b>  | 0.33         | 1.11         |
| AU-Cpr  | 0.15                    | -0.10       | -0.08       | <b>0.42</b> | 0.73                                        | 0.79        | 0.59        | <b>0.40</b> | 0.87                                        | 0.35         | 0.59         | <b>0.18</b>  |
| AU-DaP  | 0.76                    | 0.76        | 0.74        | <b>0.86</b> | 1.26                                        | 1.06        | 1.23        | <b>0.93</b> | 1.00                                        | 0.86         | <b>0.55</b>  | 1.23         |
| AU-DaS  | 0.74                    | <b>0.78</b> | 0.66        | 0.74        | 1.36                                        | <b>0.74</b> | 1.01        | 1.26        | 0.49                                        | 0.47         | <b>0.27</b>  | 1.05         |
| AU-Dry  | <b>0.63</b>             | 0.41        | 0.52        | 0.54        | 1.04                                        | 0.81        | 1.10        | <b>1.74</b> | 0.43                                        | 0.59         | <b>0.31</b>  | 3.09         |
| AU-Stp  | <b>0.69</b>             | 0.65        | 0.47        | <b>0.68</b> | 0.89                                        | <b>0.51</b> | 0.71        | 0.84        | 1.04                                        | 0.95         | <b>0.81</b>  | 1.16         |
| AU-Tum  | <b>0.64</b>             | 0.39        | 0.55        | 0.49        | <b>1.44</b>                                 | 1.61        | <b>1.52</b> | <b>1.51</b> | -1.49                                       | -0.68        | <b>-0.55</b> | -1.21        |
| AU-Wom  | <b>0.72</b>             | 0.48        | 0.49        | 0.67        | 1.10                                        | 1.41        | 1.19        | <b>0.95</b> | <b>0.25</b>                                 | 0.68         | 0.53         | -0.42        |
| BE-Bra  | <b>0.93</b>             | 0.88        | 0.90        | 0.79        | <b>0.90</b>                                 | 1.89        | 1.38        | 1.00        | 0.94                                        | 2.28         | 1.25         | <b>0.65</b>  |
| BE-Lon  | 0.63                    | <b>0.68</b> | 0.61        | 0.55        | <b>2.12</b>                                 | 2.34        | 2.21        | 2.23        | 1.57                                        | 2.34         | 1.45         | <b>0.82</b>  |
| BE-Vie  | <b>0.96</b>             | 0.87        | 0.91        | 0.80        | <b>0.88</b>                                 | 1.96        | 1.26        | 1.24        | 0.80                                        | 2.02         | 0.91         | <b>0.21</b>  |
| BR-Ji1  | <b>0.80</b>             | 0.51        | 0.34        | 0.76        | <b>1.53</b>                                 | 1.92        | 2.09        | <b>1.47</b> | 1.14                                        | 1.92         | <b>-0.32</b> | 2.49         |
| BR-Ji2  | <b>0.84</b>             | <b>0.83</b> | -0.03       | <b>0.82</b> | <b>0.82</b>                                 | <b>0.79</b> | 1.57        | 1.34        | -1.20                                       | -0.40        | -1.98        | <b>-0.08</b> |
| BR-Ma2  | <b>0.67</b>             | 0.64        | -0.50       | -0.19       | <b>0.83</b>                                 | <b>0.86</b> | 1.71        | 1.48        | -2.39                                       | <b>0.69</b>  | -1.48        | 1.76         |
| BR-Sp1  | <b>0.94</b>             | <b>0.95</b> | 0.87        | <b>0.94</b> | 1.04                                        | <b>0.72</b> | 1.31        | <b>0.75</b> | 0.54                                        | -0.47        | 0.36         | <b>-0.20</b> |
| CA-Oas  | <b>0.96</b>             | 0.90        | 0.85        | 0.81        | <b>0.77</b>                                 | 1.07        | 1.29        | 1.25        | 0.70                                        | 0.49         | 0.51         | <b>0.19</b>  |
| CA-Obs  | <b>0.95</b>             | 0.90        | 0.90        | 0.86        | 1.25                                        | 1.46        | 1.41        | <b>1.15</b> | 0.84                                        | 0.88         | 0.79         | <b>0.47</b>  |
| CA-Qcu  | <b>0.74</b>             | 0.38        | 0.51        | 0.54        | <b>1.52</b>                                 | 1.95        | 2.19        | 1.73        | 0.70                                        | 1.09         | 0.91         | <b>0.55</b>  |
| CA-Qfo  | <b>0.97</b>             | 0.88        | 0.90        | 0.91        | <b>1.10</b>                                 | 1.39        | 1.69        | 1.23        | 1.01                                        | 1.17         | 1.21         | <b>0.86</b>  |
| CH-Cha  | 0.77                    | 0.78        | 0.84        | <b>0.88</b> | 1.68                                        | 2.13        | 1.86        | <b>1.30</b> | -0.32                                       | 0.73         | <b>0.20</b>  | -0.38        |
| CH-Dav  | 0.85                    | 0.91        | 0.92        | <b>0.95</b> | 1.55                                        | 1.22        | 1.42        | <b>0.91</b> | 0.74                                        | 0.97         | 0.57         | <b>0.36</b>  |
| CH-Fru  | 0.88                    | 0.87        | <b>0.91</b> | 0.89        | 1.29                                        | 1.77        | 1.48        | <b>1.17</b> | <b>0.40</b>                                 | 1.28         | 0.81         | <b>0.47</b>  |
| CH-Lae  | <b>0.95</b>             | 0.86        | 0.91        | 0.90        | <b>1.15</b>                                 | 2.02        | 1.74        | 1.26        | <b>0.48</b>                                 | 1.65         | 0.92         | <b>0.54</b>  |
| CH-Oe2  | 0.36                    | <b>0.70</b> | 0.69        | 0.65        | 2.62                                        | 2.43        | 2.24        | <b>1.82</b> | 1.38                                        | 2.13         | 1.68         | <b>1.23</b>  |
| CZ-BK1  | <b>0.91</b>             | 0.88        | <b>0.91</b> | 0.87        | <b>1.23</b>                                 | 2.00        | 1.40        | <b>1.28</b> | 0.46                                        | 1.30         | 0.61         | <b>0.34</b>  |
| CZ-BK2  | <b>0.92</b>             | 0.85        | 0.82        | 0.81        | <b>1.42</b>                                 | 2.15        | 1.77        | 1.53        | 1.59                                        | 2.22         | 1.60         | <b>1.32</b>  |
| DE-Geb  | 0.66                    | <b>0.77</b> | 0.75        | 0.72        | 1.88                                        | 2.08        | 1.68        | <b>1.45</b> | 1.59                                        | 2.21         | 1.48         | <b>1.13</b>  |
| DE-Lkb  | <b>0.90</b>             | 0.69        | 0.73        | 0.74        | 1.90                                        | 2.66        | 2.27        | <b>1.79</b> | 2.42                                        | 3.16         | 2.42         | <b>2.19</b>  |
| DE-Lnf  | <b>0.97</b>             | 0.78        | 0.78        | 0.75        | <b>0.63</b>                                 | 2.04        | 1.63        | 1.56        | 0.76                                        | 1.36         | 0.56         | <b>0.11</b>  |
| DE-Obe  | <b>0.95</b>             | 0.85        | 0.89        | 0.87        | <b>0.86</b>                                 | 1.82        | 1.25        | 1.10        | 0.54                                        | 1.08         | 0.46         | <b>0.25</b>  |
| DE-Seh  | 0.62                    | <b>0.67</b> | 0.64        | <b>0.67</b> | 2.09                                        | 2.43        | 2.11        | <b>1.73</b> | <b>0.91</b>                                 | 1.84         | 1.55         | 1.04         |
| DE-Spw  | <b>0.83</b>             | 0.73        | 0.81        | 0.74        | <b>1.31</b>                                 | 1.94        | 1.40        | 1.45        | 0.36                                        | 0.44         | <b>0.26</b>  | -0.63        |
| DE-Tha  | <b>0.95</b>             | 0.86        | 0.91        | 0.92        | <b>0.86</b>                                 | 1.74        | 1.15        | <b>0.87</b> | 0.19                                        | 0.78         | <b>0.08</b>  | -0.23        |
| ES-LgS  | <b>0.57</b>             | 0.31        | -0.02       | -0.26       | 0.64                                        | <b>0.50</b> | 0.72        | 0.71        | 1.32                                        | 0.19         | 0.74         | <b>0.23</b>  |
| FI-Hyy  | <b>0.97</b>             | 0.89        | 0.91        | 0.91        | <b>0.58</b>                                 | 1.52        | 1.41        | 1.21        | <b>0.32</b>                                 | 1.22         | 0.89         | 0.71         |
| FI-Lom  | <b>0.96</b>             | 0.79        | 0.78        | 0.76        | <b>0.62</b>                                 | 1.53        | 1.52        | 1.28        | <b>0.77</b>                                 | 1.24         | 0.89         | <b>0.74</b>  |
| IT-Col  | <b>0.81</b>             | 0.60        | 0.62        | 0.45        | <b>1.26</b>                                 | 1.96        | 2.02        | 1.96        | 1.14                                        | 1.66         | 2.54         | <b>0.32</b>  |
| IT-Lav  | <b>0.91</b>             | 0.85        | 0.87        | 0.84        | <b>1.21</b>                                 | 1.64        | 1.65        | 1.36        | 0.49                                        | 0.16         | <b>-0.02</b> | 0.19         |
| IT-MBo  | <b>0.92</b>             | 0.88        | 0.90        | 0.88        | <b>0.93</b>                                 | 1.09        | 1.32        | 1.10        | <b>0.57</b>                                 | 0.77         | 0.84         | <b>0.51</b>  |
| IT-Ren  | <b>0.90</b>             | <b>0.89</b> | <b>0.89</b> | <b>0.91</b> | <b>1.15</b>                                 | 1.22        | 1.59        | <b>1.05</b> | 0.44                                        | 0.80         | 0.72         | <b>0.33</b>  |
| RU-Tks  | <b>0.76</b>             | 0.62        | 0.65        | 0.45        | <b>0.55</b>                                 | 0.93        | 0.71        | <b>0.61</b> | 0.44                                        | 0.25         | <b>0.05</b>  | <b>-0.04</b> |
| SD-Dem  | 0.67                    | 0.45        | 0.41        | <b>0.77</b> | 0.74                                        | 1.01        | 0.69        | <b>0.55</b> | 0.17                                        | -1.04        | <b>-0.16</b> | -0.42        |
| SN-Dhr  | <b>0.27</b>             | 0.23        | 0.21        | 0.21        | 2.48                                        | 2.57        | <b>2.26</b> | <b>2.30</b> | <b>-0.92</b>                                | -2.69        | -1.65        | -3.42        |
| US-AR1  | <b>0.71</b>             | 0.68        | 0.53        | 0.43        | 1.09                                        | 0.93        | 0.88        | <b>0.77</b> | 1.04                                        | 0.79         | 0.80         | <b>-0.05</b> |
| US-AR2  | 0.70                    | <b>0.80</b> | 0.48        | 0.68        | 1.16                                        | 0.84        | 0.88        | <b>0.48</b> | 1.27                                        | 1.00         | 1.03         | <b>0.16</b>  |
| US-ARM  | 0.57                    | <b>0.71</b> | 0.57        | 0.60        | 1.68                                        | 1.19        | 1.16        | <b>0.94</b> | 2.09                                        | 1.34         | 0.98         | <b>0.61</b>  |
| US-GLE  | <b>0.84</b>             | 0.73        | 0.76        | 0.45        | <b>0.53</b>                                 | 0.75        | 0.80        | 0.76        | 0.24                                        | <b>0.11</b>  | 0.44         | -0.30        |
| US-Ha1  | <b>0.94</b>             | 0.84        | 0.87        | 0.79        | <b>1.11</b>                                 | 2.36        | 2.08        | 2.17        | <b>1.35</b>                                 | 1.79         | 1.87         | 1.59         |
| US-KFS  | <b>0.79</b>             | 0.68        | 0.54        | 0.39        | <b>1.94</b>                                 | 2.75        | 2.69        | 3.17        | <b>-1.75</b>                                | <b>-1.80</b> | -2.78        | -2.04        |
| US-Kon  | <b>0.71</b>             | <b>0.70</b> | 0.48        | 0.67        | <b>3.26</b>                                 | <b>3.17</b> | 4.03        | 3.63        | <b>-3.75</b>                                | -4.89        | -4.93        | -5.22        |

|         |             |             |             |             |             |             |             |             |              |              |              |              |
|---------|-------------|-------------|-------------|-------------|-------------|-------------|-------------|-------------|--------------|--------------|--------------|--------------|
| US-Me2  | 0.87        | 0.91        | <b>0.94</b> | 0.65        | 0.71        | <b>0.53</b> | <b>0.60</b> | 1.02        | -0.69        | <b>-0.08</b> | -0.23        | -1.22        |
| US-Me3  | 0.83        | 0.87        | <b>0.89</b> | 0.75        | 0.83        | 0.66        | 1.24        | <b>0.48</b> | 0.58         | 0.95         | 0.98         | <b>-0.13</b> |
| US-Me6  | 0.65        | 0.74        | <b>0.80</b> | 0.69        | 0.85        | 0.77        | 1.11        | <b>0.63</b> | <b>0.35</b>  | 0.58         | 0.86         | <b>-0.37</b> |
| US-MMS  | <b>0.92</b> | <b>0.93</b> | 0.89        | 0.71        | <b>1.16</b> | 1.68        | <b>1.21</b> | 2.06        | 1.53         | 1.32         | <b>1.06</b>  | <b>1.14</b>  |
| US-Ne1  | 0.77        | <b>0.89</b> | 0.70        | 0.53        | 2.35        | <b>1.68</b> | 2.45        | 3.03        | 0.87         | 0.29         | <b>-0.04</b> | -0.41        |
| US-Ne2  | 0.75        | <b>0.80</b> | 0.67        | 0.50        | 2.27        | <b>2.15</b> | 2.27        | 2.82        | 1.06         | 0.65         | 0.20         | <b>-0.05</b> |
| US-Ne3  | 0.72        | <b>0.80</b> | 0.56        | 0.49        | <b>2.11</b> | <b>2.07</b> | 2.20        | 2.61        | 1.56         | 0.82         | 0.57         | <b>0.15</b>  |
| US-NR1  | <b>0.86</b> | <b>0.88</b> | <b>0.87</b> | 0.77        | <b>0.60</b> | <b>0.60</b> | 0.84        | 0.75        | <b>-0.02</b> | 0.41         | 0.72         | -0.23        |
| US-Seg  | 0.50        | <b>0.65</b> | 0.43        | 0.56        | 0.72        | <b>0.62</b> | 0.77        | 0.80        | <b>-0.16</b> | -0.48        | -0.30        | -0.96        |
| US-Ses  | 0.66        | <b>0.76</b> | 0.42        | 0.58        | <b>0.49</b> | <b>0.40</b> | 0.62        | 0.60        | 0.40         | <b>0.03</b>  | 0.15         | -0.51        |
| US-SRG  | 0.71        | <b>0.87</b> | 0.52        | 0.59        | 0.77        | <b>0.38</b> | 0.59        | 0.59        | 0.69         | 0.50         | 0.23         | <b>-0.07</b> |
| US-SRM  | 0.61        | <b>0.81</b> | 0.47        | 0.48        | 0.89        | <b>0.43</b> | <b>0.45</b> | <b>0.51</b> | 0.88         | 0.68         | 0.40         | <b>0.09</b>  |
| US-Sta  | 0.74        | 0.61        | 0.88        | <b>0.90</b> | 0.79        | 0.69        | 0.87        | <b>0.22</b> | 0.66         | 0.61         | 0.66         | <b>-0.16</b> |
| US-Ton  | 0.47        | 0.72        | 0.68        | <b>0.88</b> | 1.40        | 1.00        | 1.17        | <b>0.43</b> | 1.44         | 2.30         | 1.70         | <b>0.40</b>  |
| US-Twt  | <b>0.49</b> | 0.07        | 0.28        | -0.11       | <b>2.14</b> | 2.55        | 2.35        | 2.64        | 1.33         | 0.90         | <b>0.53</b>  | <b>0.55</b>  |
| US-Var  | 0.27        | 0.32        | 0.30        | <b>0.69</b> | <b>1.56</b> | <b>1.58</b> | 1.71        | 0.82        | 1.08         | 2.38         | 1.78         | <b>0.78</b>  |
| US-Whs  | 0.69        | <b>0.79</b> | 0.63        | 0.52        | 0.97        | 0.60        | <b>0.29</b> | <b>0.36</b> | 1.07         | 0.91         | 0.59         | <b>0.29</b>  |
| US-Wkg  | 0.55        | <b>0.72</b> | 0.67        | 0.46        | 0.72        | <b>0.39</b> | <b>0.36</b> | <b>0.41</b> | 0.77         | 0.54         | 0.48         | <b>-0.03</b> |
| ZA-Kru  | 0.65        | 0.66        | 0.37        | <b>0.70</b> | <b>1.51</b> | 1.62        | 1.63        | 1.68        | <b>1.30</b>  | 2.31         | 1.82         | 2.92         |
| ZM-Mon  | 0.62        | 0.35        | <b>0.74</b> | 0.63        | 1.51        | 1.50        | <b>1.03</b> | 1.46        | 1.59         | <b>1.33</b>  | 1.70         | <b>1.38</b>  |
| Average | <b>0.75</b> | 0.71        | 0.64        | 0.66        | <b>1.24</b> | 1.42        | 1.42        | 1.29        | 0.57         | 0.77         | 0.50         | <b>0.26</b>  |



**Table S5: Statistics of LE retrievals from WECANN, an ANN retrieval with NDVI instead of SIF as input, and an ANN retrieval with EVI instead of SIF as input compared to eddy covariance measurements.**

| Site ID | Correlation Coefficient |              |             | RMSE [W m <sup>-2</sup> ] |              |              | Bias [W m <sup>-2</sup> ] |               |              |
|---------|-------------------------|--------------|-------------|---------------------------|--------------|--------------|---------------------------|---------------|--------------|
|         | WECANN                  | WECANN NDVI  | WECANN EVI  | WECANN                    | WECANN NDVI  | WECANN EVI   | WECANN                    | WECANN NDVI   | WECANN EVI   |
| AT-Neu  | <b>0.92</b>             | 0.90         | <b>0.93</b> | <b>15.91</b>              | 17.27        | 18.09        | -4.00                     | <b>-3.45</b>  | -10.95       |
| AU-ASM  | <b>0.81</b>             | <b>0.80</b>  | <b>0.80</b> | <b>18.97</b>              | 20.17        | 21.08        | -5.84                     | <b>-5.10</b>  | -13.32       |
| AU-Cpr  | 0.55                    | 0.59         | <b>0.61</b> | 14.04                     | 12.00        | <b>11.15</b> | 2.24                      | <b>1.86</b>   | -6.43        |
| AU-DaP  | <b>0.80</b>             | <b>0.80</b>  | <b>0.79</b> | <b>29.50</b>              | <b>29.76</b> | 30.99        | <b>-1.69</b>              | 4.27          | -14.19       |
| AU-DaS  | <b>0.90</b>             | <b>0.90</b>  | <b>0.89</b> | 16.16                     | <b>14.56</b> | <b>14.82</b> | -21.37                    | <b>-14.98</b> | -33.39       |
| AU-Dry  | <b>0.65</b>             | <b>0.66</b>  | <b>0.64</b> | 31.41                     | <b>30.18</b> | <b>30.72</b> | -23.62                    | <b>-17.43</b> | -35.93       |
| AU-Stp  | <b>0.86</b>             | 0.84         | 0.81        | <b>20.41</b>              | 21.91        | 24.67        | -1.95                     | <b>-0.70</b>  | -12.39       |
| AU-Tum  | 0.89                    | <b>0.92</b>  | 0.85        | 21.39                     | <b>19.78</b> | 24.28        | -20.45                    | <b>-16.98</b> | -28.84       |
| AU-Wom  | <b>0.88</b>             | <b>0.87</b>  | 0.82        | <b>15.63</b>              | 16.21        | 18.96        | -24.39                    | <b>-23.43</b> | -33.87       |
| BE-Bra  | <b>0.95</b>             | <b>0.96</b>  | <b>0.96</b> | 9.04                      | <b>8.28</b>  | <b>8.03</b>  | 10.66                     | 10.24         | <b>3.71</b>  |
| BE-Lon  | <b>0.87</b>             | <b>0.88</b>  | <b>0.89</b> | 16.03                     | 15.58        | <b>15.05</b> | 6.61                      | 4.55          | <b>-2.50</b> |
| BE-Vie  | <b>0.94</b>             | <b>0.94</b>  | <b>0.94</b> | <b>10.22</b>              | 10.30        | 10.90        | 10.76                     | 9.77          | <b>1.84</b>  |
| BR-Ji1  | 0.13                    | 0.36         | <b>0.49</b> | 16.67                     | <b>15.41</b> | 16.38        | 27.83                     | 25.81         | <b>8.91</b>  |
| BR-Ji2  | <b>0.77</b>             | <b>0.79</b>  | 0.49        | <b>4.16</b>               | <b>3.79</b>  | 13.98        | <b>4.85</b>               | 5.84          | -13.03       |
| BR-Ma2  | -0.26                   | <b>-0.03</b> | -0.55       | 13.33                     | <b>10.83</b> | 14.63        | 7.71                      | 15.23         | <b>-6.87</b> |
| BR-Spl  | 0.84                    | <b>0.88</b>  | 0.86        | 14.74                     | <b>12.88</b> | 14.08        | 7.63                      | <b>6.52</b>   | -11.08       |
| CA-Qcu  | <b>0.97</b>             | <b>0.97</b>  | <b>0.98</b> | <b>8.00</b>               | <b>7.96</b>  | 9.43         | <b>1.48</b>               | 2.41          | -3.06        |
| CA-Qfo  | <b>0.98</b>             | <b>0.98</b>  | <b>0.98</b> | 6.97                      | 8.20         | <b>5.12</b>  | 8.52                      | 9.24          | <b>3.90</b>  |
| CH-Cha  | <b>0.91</b>             | <b>0.92</b>  | <b>0.93</b> | <b>20.68</b>              | <b>20.31</b> | 21.27        | -15.29                    | <b>-14.96</b> | -22.76       |
| CH-Dav  | <b>0.95</b>             | <b>0.95</b>  | <b>0.95</b> | 16.43                     | <b>15.60</b> | 18.34        | <b>-21.63</b>             | -22.60        | -26.88       |
| CH-Fru  | <b>0.93</b>             | <b>0.94</b>  | <b>0.95</b> | <b>16.66</b>              | <b>16.21</b> | 17.74        | -9.05                     | <b>-8.72</b>  | -16.62       |
| DE-Geb  | 0.89                    | 0.90         | <b>0.92</b> | 14.85                     | 14.04        | <b>13.02</b> | 10.81                     | 9.62          | <b>2.42</b>  |
| DE-Lkb  | 0.90                    | 0.90         | <b>0.92</b> | 14.49                     | 13.89        | <b>10.18</b> | 11.71                     | 11.68         | <b>3.57</b>  |
| DE-Lnf  | <b>0.96</b>             | <b>0.97</b>  | <b>0.98</b> | 9.51                      | <b>8.75</b>  | 10.31        | 8.92                      | 7.11          | <b>0.16</b>  |
| DE-Obe  | <b>0.94</b>             | <b>0.95</b>  | <b>0.95</b> | 10.84                     | <b>10.00</b> | 10.63        | 5.28                      | 4.70          | <b>-2.07</b> |
| DE-Seh  | 0.78                    | 0.79         | <b>0.81</b> | 20.13                     | 19.43        | <b>17.39</b> | <b>3.42</b>               | <b>3.00</b>   | -4.93        |
| DE-Tha  | <b>0.96</b>             | <b>0.96</b>  | <b>0.97</b> | 9.13                      | 8.57         | <b>7.24</b>  | 5.29                      | 4.73          | <b>-2.29</b> |
| ES-LgS  | <b>0.74</b>             | 0.49         | 0.35        | <b>14.80</b>              | 19.34        | 20.95        | <b>-1.94</b>              | -9.84         | -17.56       |
| FI-Hyy  | <b>0.97</b>             | <b>0.97</b>  | <b>0.98</b> | <b>6.48</b>               | 7.87         | <b>6.57</b>  | <b>1.09</b>               | 3.59          | -4.06        |
| FI-Lom  | <b>0.89</b>             | <b>0.88</b>  | <b>0.90</b> | 11.44                     | 12.65        | <b>9.96</b>  | 8.52                      | 8.11          | <b>3.02</b>  |
| FR-Pue  | 0.84                    | 0.82         | <b>0.86</b> | 16.57                     | 18.26        | <b>15.51</b> | 8.55                      | 11.90         | <b>0.91</b>  |
| IT-Col  | 0.87                    | <b>0.90</b>  | 0.80        | 24.05                     | <b>21.45</b> | 28.94        | <b>4.27</b>               | <b>4.82</b>   | -6.86        |
| IT-Lav  | <b>0.94</b>             | <b>0.95</b>  | <b>0.95</b> | 13.73                     | 11.92        | <b>8.62</b>  | 4.07                      | <b>-0.09</b>  | -8.07        |
| IT-MBo  | <b>0.95</b>             | <b>0.96</b>  | <b>0.95</b> | 15.01                     | <b>14.18</b> | 17.17        | <b>-2.82</b>              | <b>-2.20</b>  | -7.29        |
| IT-Ren  | <b>0.94</b>             | <b>0.94</b>  | <b>0.95</b> | 11.18                     | <b>11.07</b> | 11.49        | <b>1.80</b>               | 2.48          | -2.67        |
| RU-Tks  | <b>0.51</b>             | <b>0.52</b>  | <b>0.51</b> | 19.22                     | 19.62        | <b>17.88</b> | <b>0.12</b>               | <b>0.48</b>   | -2.21        |
| SD-Dem  | 0.73                    | <b>0.79</b>  | 0.76        | <b>20.60</b>              | 21.68        | 21.11        | <b>-17.40</b>             | -23.36        | -25.32       |
| SN-Dhr  | 0.36                    | 0.38         | <b>0.40</b> | 47.17                     | 44.84        | <b>42.68</b> | <b>-21.13</b>             | -24.59        | -32.48       |
| US-AR1  | <b>0.82</b>             | 0.79         | 0.78        | <b>17.42</b>              | 18.19        | 18.85        | <b>-3.09</b>              | -4.95         | -12.27       |
| US-AR2  | <b>0.52</b>             | <b>0.51</b>  | <b>0.52</b> | 23.49                     | 21.00        | <b>19.42</b> | 3.14                      | <b>1.29</b>   | -6.03        |
| US-ARM  | 0.76                    | 0.76         | <b>0.78</b> | 22.47                     | 21.91        | <b>20.04</b> | 3.29                      | <b>-0.58</b>  | -9.76        |
| US-Bar  | 0.92                    | 0.92         | <b>0.94</b> | 13.80                     | 14.24        | <b>12.28</b> | 20.47                     | 19.60         | <b>15.01</b> |
| US-Bkg  | <b>0.89</b>             | <b>0.89</b>  | <b>0.89</b> | <b>22.72</b>              | 23.14        | 24.92        | -11.84                    | -13.80        | -19.55       |
| US-Fwf  | <b>0.85</b>             | 0.79         | 0.67        | <b>15.38</b>              | <b>15.38</b> | 17.29        | -9.24                     | <b>-7.72</b>  | -13.88       |
| US-GLE  | <b>0.79</b>             | <b>0.78</b>  | 0.73        | <b>13.55</b>              | <b>13.40</b> | 14.29        | <b>-17.33</b>             | <b>-17.29</b> | -22.24       |
| US-Ha2  | <b>0.78</b>             | <b>0.78</b>  | <b>0.79</b> | 22.60                     | 23.22        | <b>21.23</b> | 26.32                     | 24.97         | <b>19.24</b> |
| US-IB1  | 0.92                    | 0.92         | <b>0.94</b> | 16.80                     | 16.51        | <b>15.23</b> | <b>0.24</b>               | -1.89         | -8.39        |
| US-ICb  | <b>0.93</b>             | <b>0.94</b>  | <b>0.94</b> | 8.36                      | <b>7.26</b>  | 8.22         | -3.09                     | <b>-0.52</b>  | -2.82        |
| US-ICs  | <b>0.94</b>             | <b>0.95</b>  | <b>0.94</b> | <b>8.58</b>               | <b>8.19</b>  | 10.14        | -4.25                     | <b>-2.15</b>  | -4.73        |
| US-ICt  | <b>0.92</b>             | <b>0.93</b>  | <b>0.92</b> | 9.08                      | <b>8.61</b>  | 9.63         | <b>-0.36</b>              | 1.08          | -3.23        |
| US-KFS  | <b>0.93</b>             | <b>0.94</b>  | <b>0.95</b> | 15.35                     | 14.22        | <b>11.65</b> | 11.46                     | 8.76          | <b>0.05</b>  |

|         |             |             |             |              |              |              |               |               |              |
|---------|-------------|-------------|-------------|--------------|--------------|--------------|---------------|---------------|--------------|
| US-Kon  | <b>0.87</b> | <b>0.88</b> | <b>0.88</b> | 22.64        | <b>21.86</b> | 22.75        | 4.18          | <b>2.08</b>   | -7.30        |
| US-Me2  | <b>0.89</b> | 0.83        | 0.84        | <b>13.89</b> | 16.26        | 18.01        | <b>-8.50</b>  | -9.66         | -18.77       |
| US-MMS  | <b>0.95</b> | <b>0.96</b> | <b>0.95</b> | <b>15.58</b> | <b>15.22</b> | 18.37        | 11.41         | 8.33          | <b>1.05</b>  |
| US-MOz  | 0.90        | 0.91        | <b>0.93</b> | 17.49        | 16.76        | <b>15.01</b> | 16.49         | 14.32         | <b>5.71</b>  |
| US-Mpj  | 0.85        | <b>0.87</b> | <b>0.88</b> | <b>9.14</b>  | <b>9.08</b>  | 9.52         | <b>-5.43</b>  | -7.96         | -12.50       |
| US-NC2  | <b>0.95</b> | <b>0.96</b> | <b>0.96</b> | 10.88        | 11.74        | <b>9.69</b>  | -23.05        | <b>-10.87</b> | -26.03       |
| US-Ne1  | <b>0.84</b> | <b>0.84</b> | <b>0.83</b> | <b>36.45</b> | 37.45        | 40.61        | <b>-26.85</b> | -29.25        | -36.54       |
| US-Ne2  | <b>0.80</b> | <b>0.80</b> | <b>0.79</b> | <b>38.38</b> | 39.40        | 41.50        | <b>-22.08</b> | -24.48        | -31.77       |
| US-Ne3  | <b>0.86</b> | <b>0.85</b> | <b>0.85</b> | <b>25.89</b> | 26.47        | 27.58        | <b>-6.30</b>  | -8.70         | -16.00       |
| US-NR1  | 0.89        | <b>0.91</b> | 0.82        | 13.65        | <b>12.59</b> | 17.84        | -24.68        | <b>-22.42</b> | -29.11       |
| US-Ro1  | 0.93        | 0.93        | <b>0.95</b> | 15.12        | 14.15        | <b>11.97</b> | 5.68          | 4.14          | <b>-2.59</b> |
| US-Seg  | <b>0.85</b> | 0.80        | 0.81        | <b>8.55</b>  | 10.00        | 10.26        | 4.05          | <b>1.12</b>   | -3.63        |
| US-Ses  | <b>0.85</b> | 0.81        | 0.81        | <b>8.05</b>  | 9.00         | 9.20         | 5.38          | <b>2.44</b>   | <b>-2.30</b> |
| US-Slt  | 0.86        | <b>0.90</b> | 0.88        | 22.42        | <b>18.37</b> | 21.28        | <b>-3.62</b>  | 5.14          | -6.64        |
| US-Snd  | <b>0.76</b> | <b>0.76</b> | 0.40        | 17.72        | <b>16.60</b> | 24.46        | <b>-16.66</b> | -22.51        | -43.17       |
| US-SP1  | 0.69        | <b>0.71</b> | 0.68        | 24.29        | 23.34        | <b>22.99</b> | 20.10         | 25.04         | <b>4.80</b>  |
| US-SP3  | <b>0.68</b> | 0.66        | <b>0.69</b> | <b>31.33</b> | 32.06        | <b>31.27</b> | 8.62          | 13.05         | <b>-7.17</b> |
| US-SRG  | 0.90        | <b>0.92</b> | <b>0.92</b> | <b>13.87</b> | <b>13.81</b> | 15.54        | <b>-7.06</b>  | -7.98         | -15.63       |
| US-SRM  | 0.87        | <b>0.90</b> | <b>0.89</b> | 12.30        | <b>11.30</b> | 12.72        | <b>-0.77</b>  | -1.50         | -9.33        |
| US-Ton  | 0.55        | 0.46        | <b>0.79</b> | 23.84        | 27.14        | <b>17.43</b> | 11.77         | 11.77         | <b>-4.35</b> |
| US-Twt  | <b>0.77</b> | 0.71        | -0.12       | <b>51.52</b> | 55.13        | 73.98        | <b>-42.74</b> | -48.23        | -67.53       |
| US-Var  | 0.16        | 0.04        | <b>0.56</b> | 36.06        | 39.91        | <b>27.14</b> | 17.89         | 17.91         | <b>1.67</b>  |
| US-Vcm  | <b>0.83</b> | <b>0.84</b> | 0.78        | <b>15.70</b> | 16.58        | 18.98        | <b>-16.43</b> | -17.76        | -23.92       |
| US-Whs  | 0.84        | <b>0.89</b> | <b>0.88</b> | 11.61        | <b>9.75</b>  | 10.75        | 6.09          | 5.19          | <b>-2.55</b> |
| US-Wjs  | <b>0.89</b> | <b>0.90</b> | <b>0.89</b> | <b>9.72</b>  | 10.97        | 12.03        | <b>-4.64</b>  | -7.26         | -12.57       |
| US-Wkg  | 0.81        | <b>0.87</b> | <b>0.88</b> | 14.69        | <b>13.54</b> | 14.34        | 1.16          | <b>-0.53</b>  | -7.10        |
| US-Wrc  | 0.69        | <b>0.73</b> | 0.60        | <b>17.22</b> | 19.23        | <b>17.79</b> | 23.54         | 24.04         | <b>12.64</b> |
| ZA-Kru  | 0.50        | 0.52        | <b>0.54</b> | 39.37        | 37.85        | <b>36.58</b> | <b>-2.94</b>  | <b>2.86</b>   | -14.41       |
| ZM-Mon  | <b>0.54</b> | 0.53        | 0.51        | <b>33.85</b> | <b>33.51</b> | <b>33.54</b> | <b>6.63</b>   | 9.08          | -9.68        |
| Average | <b>0.80</b> | <b>0.80</b> | 0.78        | <b>17.95</b> | <b>17.86</b> | 18.45        | <b>-1.04</b>  | <b>-1.08</b>  | -10.41       |

**Table S6: Similar to Table S4 but for H instead of LE**

| Site ID | Correlation Coefficient |             |             | RMSE [W m <sup>-2</sup> ] |              |              | Bias [W m <sup>-2</sup> ] |              |               |
|---------|-------------------------|-------------|-------------|---------------------------|--------------|--------------|---------------------------|--------------|---------------|
|         | WECANN                  | WECANN NDVI | WECANN EVI  | WECANN                    | WECANN NDVI  | WECANN EVI   | WECANN                    | WECANN NDVI  | WECANN EVI    |
| AT-Neu  | 0.86                    | <b>0.88</b> | <b>0.89</b> | <b>6.92</b>               | <b>6.51</b>  | 7.78         | <b>17.37</b>              | 19.30        | 18.99         |
| AU-ASM  | <b>0.74</b>             | <b>0.74</b> | 0.69        | <b>18.09</b>              | <b>18.12</b> | 19.49        | -38.40                    | -38.14       | <b>-37.12</b> |
| AU-Cpr  | 0.73                    | 0.75        | <b>0.77</b> | 29.02                     | 28.32        | <b>27.20</b> | -12.33                    | -11.47       | <b>-8.33</b>  |
| AU-DaP  | <b>0.65</b>             | 0.61        | 0.52        | <b>25.55</b>              | 26.75        | 28.72        | <b>-4.27</b>              | -6.54        | 7.08          |
| AU-DaS  | 0.75                    | <b>0.78</b> | 0.72        | 13.90                     | <b>11.49</b> | 12.01        | 5.06                      | <b>2.44</b>  | 16.22         |
| AU-Dry  | 0.58                    | <b>0.62</b> | 0.57        | 22.32                     | <b>21.30</b> | 22.43        | <b>-4.62</b>              | -7.06        | 6.47          |
| AU-Stp  | <b>0.66</b>             | 0.62        | 0.37        | <b>14.86</b>              | 15.47        | 18.75        | -6.56                     | -5.67        | <b>2.00</b>   |
| AU-Tum  | 0.73                    | <b>0.75</b> | 0.69        | 18.31                     | <b>17.51</b> | 21.13        | <b>2.35</b>               | <b>2.55</b>  | 8.60          |
| AU-Wom  | <b>0.87</b>             | <b>0.88</b> | 0.85        | 21.72                     | <b>21.21</b> | <b>21.20</b> | <b>3.67</b>               | <b>3.83</b>  | 10.15         |
| BE-Bra  | 0.86                    | <b>0.88</b> | 0.86        | 17.89                     | 17.41        | <b>17.27</b> | -9.11                     | -8.80        | <b>-6.20</b>  |
| BE-Lon  | <b>0.77</b>             | <b>0.77</b> | <b>0.76</b> | 13.83                     | <b>13.70</b> | 13.99        | <b>5.29</b>               | 7.52         | 9.21          |
| BE-Vie  | <b>0.87</b>             | <b>0.88</b> | 0.85        | 17.89                     | <b>16.33</b> | <b>16.22</b> | -13.92                    | -12.27       | <b>-11.02</b> |
| BR-Ji1  | 0.29                    | 0.30        | <b>0.35</b> | <b>9.27</b>               | 10.06        | 13.23        | -4.88                     | <b>-3.80</b> | 9.21          |
| BR-Ji2  | <b>0.83</b>             | <b>0.83</b> | 0.78        | <b>4.79</b>               | <b>4.09</b>  | 8.17         | 7.00                      | <b>5.57</b>  | 19.88         |
| BR-Ma2  | 0.84                    | 0.76        | <b>0.92</b> | 3.18                      | 4.17         | <b>2.98</b>  | <b>1.76</b>               | -4.85        | 14.33         |
| BR-Spl  | <b>0.92</b>             | 0.85        | 0.83        | <b>5.31</b>               | 5.81         | 6.42         | <b>4.05</b>               | 6.30         | 18.08         |
| CA-Qcu  | <b>0.89</b>             | <b>0.90</b> | <b>0.90</b> | 9.22                      | <b>8.75</b>  | 9.49         | <b>9.54</b>               | 10.78        | 13.16         |
| CA-Qfo  | 0.83                    | <b>0.85</b> | 0.75        | <b>23.35</b>              | <b>23.48</b> | 24.90        | -17.06                    | -15.87       | <b>-14.00</b> |
| CH-Cha  | <b>0.81</b>             | <b>0.81</b> | <b>0.80</b> | <b>7.26</b>               | <b>7.91</b>  | 9.36         | <b>6.73</b>               | 8.93         | 9.08          |
| CH-Dav  | <b>0.75</b>             | <b>0.76</b> | 0.70        | <b>19.43</b>              | <b>19.44</b> | 19.79        | <b>-0.55</b>              | <b>0.44</b>  | 1.07          |
| CH-Fru  | <b>0.87</b>             | <b>0.88</b> | <b>0.88</b> | 8.11                      | <b>7.63</b>  | <b>7.56</b>  | <b>8.39</b>               | 10.71        | 10.91         |
| DE-Geb  | <b>0.86</b>             | <b>0.85</b> | <b>0.84</b> | 10.80                     | 10.58        | <b>10.49</b> | <b>1.80</b>               | 3.61         | 5.22          |
| DE-Lkb  | 0.82                    | <b>0.85</b> | <b>0.84</b> | 14.89                     | 13.62        | <b>12.98</b> | -7.72                     | -6.45        | <b>-4.84</b>  |
| DE-Lnf  | <b>0.25</b>             | 0.22        | <b>0.24</b> | <b>36.73</b>              | 37.34        | 37.47        | <b>15.32</b>              | 17.13        | 18.88         |
| DE-Obe  | 0.82                    | <b>0.86</b> | 0.81        | 16.05                     | <b>14.53</b> | <b>14.89</b> | -8.54                     | -7.20        | <b>-5.53</b>  |
| DE-Seh  | 0.53                    | <b>0.55</b> | <b>0.56</b> | <b>13.26</b>              | <b>13.96</b> | 15.26        | <b>13.70</b>              | 15.52        | 16.57         |
| DE-Tha  | 0.92                    | <b>0.94</b> | 0.91        | 20.92                     | 19.38        | <b>18.20</b> | -11.99                    | -10.56       | <b>-8.78</b>  |
| ES-LgS  | 0.87                    | 0.87        | <b>0.89</b> | 26.47                     | 25.56        | <b>23.76</b> | <b>1.26</b>               | 6.27         | 11.03         |
| FI-Hyy  | 0.83                    | <b>0.88</b> | 0.83        | 16.67                     | <b>15.81</b> | 16.01        | <b>-0.45</b>              | <b>-0.26</b> | 2.87          |
| FI-Lom  | 0.85                    | <b>0.88</b> | 0.86        | 10.74                     | <b>8.85</b>  | 9.97         | <b>8.73</b>               | 12.44        | 13.92         |
| FR-Pue  | <b>0.93</b>             | <b>0.94</b> | <b>0.93</b> | 21.70                     | 21.43        | <b>19.66</b> | -5.64                     | -7.15        | <b>0.52</b>   |
| IT-Col  | 0.77                    | <b>0.81</b> | 0.73        | 20.89                     | <b>19.56</b> | 22.48        | -15.20                    | -16.30       | <b>-9.18</b>  |
| IT-Lav  | <b>0.95</b>             | <b>0.95</b> | 0.93        | 27.07                     | 25.45        | <b>23.00</b> | -23.03                    | -21.03       | <b>-16.37</b> |
| IT-MBo  | <b>0.84</b>             | <b>0.85</b> | <b>0.86</b> | 15.47                     | 15.47        | <b>13.91</b> | <b>16.23</b>              | <b>16.11</b> | 17.57         |
| IT-Ren  | <b>0.91</b>             | <b>0.91</b> | <b>0.90</b> | 20.17                     | 20.27        | <b>18.57</b> | -24.96                    | -25.04       | <b>-23.61</b> |
| RU-Tks  | <b>0.63</b>             | 0.59        | 0.57        | <b>17.46</b>              | 18.79        | 20.80        | 14.20                     | 9.25         | <b>9.09</b>   |
| SD-Dem  | <b>0.64</b>             | 0.43        | 0.30        | <b>10.84</b>              | 12.33        | 12.88        | <b>4.21</b>               | 10.02        | 9.93          |
| SN-Dhr  | <b>0.60</b>             | 0.57        | 0.58        | 18.18                     | 16.62        | <b>14.17</b> | <b>30.43</b>              | 35.74        | 38.38         |
| US-AR1  | <b>0.86</b>             | <b>0.86</b> | 0.82        | <b>12.74</b>              | 13.35        | 16.01        | <b>12.19</b>              | 13.18        | 18.55         |
| US-AR2  | 0.63                    | <b>0.65</b> | <b>0.66</b> | <b>20.51</b>              | <b>20.73</b> | 21.68        | <b>3.21</b>               | 4.20         | 9.57          |
| US-ARM  | 0.78                    | 0.78        | <b>0.82</b> | 22.93                     | 22.50        | <b>20.31</b> | -3.73                     | <b>-0.06</b> | 6.60          |
| US-Bar  | 0.81                    | <b>0.83</b> | 0.80        | 22.65                     | <b>21.79</b> | <b>21.33</b> | <b>-12.33</b>             | -12.92       | -10.79        |
| US-Bkg  | <b>0.68</b>             | 0.60        | 0.54        | <b>14.78</b>              | 16.29        | 19.28        | <b>1.35</b>               | 2.79         | 7.12          |
| US-Fwf  | 0.83                    | 0.82        | <b>0.85</b> | 22.22                     | 23.10        | <b>20.86</b> | 24.42                     | <b>22.86</b> | 23.87         |
| US-GLE  | <b>0.83</b>             | <b>0.84</b> | <b>0.83</b> | 23.81                     | 23.66        | <b>22.50</b> | -5.50                     | -5.53        | <b>-2.93</b>  |
| US-Ha2  | <b>0.86</b>             | <b>0.86</b> | <b>0.85</b> | 14.03                     | 14.19        | <b>13.23</b> | -5.76                     | -5.63        | <b>-1.82</b>  |
| US-IB1  | <b>0.87</b>             | 0.83        | 0.80        | <b>9.50</b>               | 10.88        | 13.37        | <b>7.23</b>               | <b>7.80</b>  | 12.12         |
| US-ICb  | <b>0.87</b>             | <b>0.87</b> | <b>0.88</b> | 12.02                     | 11.18        | <b>10.13</b> | 23.78                     | 19.49        | <b>18.26</b>  |
| US-ICs  | 0.83                    | 0.86        | <b>0.88</b> | 13.11                     | 11.67        | <b>10.32</b> | 25.86                     | 21.42        | <b>20.04</b>  |

|         |             |              |              |              |              |              |              |               |               |
|---------|-------------|--------------|--------------|--------------|--------------|--------------|--------------|---------------|---------------|
| US-ICt  | 0.87        | 0.89         | <b>0.91</b>  | 11.60        | 10.82        | <b>9.16</b>  | 10.12        | <b>8.23</b>   | 10.80         |
| US-KFS  | 0.88        | <b>0.91</b>  | 0.88         | <b>6.17</b>  | <b>5.75</b>  | 9.16         | <b>1.65</b>  | 3.59          | 10.37         |
| US-Kon  | <b>0.53</b> | 0.51         | 0.41         | <b>13.74</b> | 14.53        | 18.41        | <b>-0.79</b> | <b>0.97</b>   | 7.82          |
| US-Me2  | <b>0.92</b> | <b>0.93</b>  | 0.90         | 21.65        | 20.97        | <b>19.53</b> | -9.08        | -8.53         | <b>-1.53</b>  |
| US-MMS  | <b>0.66</b> | 0.60         | 0.49         | <b>16.17</b> | 17.03        | 19.75        | -13.32       | -12.26        | <b>-7.30</b>  |
| US-MOz  | <b>0.69</b> | 0.67         | 0.63         | <b>14.12</b> | <b>14.23</b> | 15.41        | -9.96        | -8.08         | <b>-2.10</b>  |
| US-Mpj  | <b>0.95</b> | <b>0.94</b>  | <b>0.95</b>  | 17.52        | 16.99        | <b>16.67</b> | -29.72       | -28.46        | <b>-27.96</b> |
| US-NC2  | 0.73        | <b>0.76</b>  | 0.73         | 17.66        | <b>16.49</b> | 21.35        | <b>17.41</b> | 15.36         | 25.88         |
| US-Ne1  | <b>0.51</b> | 0.38         | 0.31         | <b>19.90</b> | 22.49        | 25.61        | <b>3.22</b>  | 4.21          | 9.26          |
| US-Ne2  | <b>0.58</b> | 0.46         | 0.39         | <b>18.15</b> | 20.65        | 23.66        | <b>2.87</b>  | 3.86          | 8.92          |
| US-Ne3  | <b>0.69</b> | 0.60         | 0.54         | <b>17.55</b> | 19.57        | 21.78        | -4.41        | -3.43         | <b>1.63</b>   |
| US-NR1  | 0.68        | <b>0.70</b>  | 0.66         | 23.92        | <b>22.83</b> | 25.24        | -9.26        | -11.15        | <b>-5.38</b>  |
| US-Ro1  | <b>0.84</b> | 0.82         | 0.78         | <b>9.35</b>  | <b>9.59</b>  | 11.92        | <b>8.12</b>  | 9.46          | 14.37         |
| US-Seg  | <b>0.87</b> | 0.85         | <b>0.88</b>  | <b>12.32</b> | 13.64        | <b>12.35</b> | -10.82       | <b>-8.86</b>  | <b>-8.36</b>  |
| US-Ses  | <b>0.92</b> | 0.89         | 0.90         | <b>9.32</b>  | 11.84        | 10.80        | -13.86       | <b>-11.90</b> | <b>-11.40</b> |
| US-Slt  | <b>0.67</b> | <b>0.68</b>  | <b>0.66</b>  | <b>20.49</b> | 21.20        | 22.52        | -6.13        | -6.78         | <b>-1.29</b>  |
| US-Snd  | <b>0.51</b> | <b>0.51</b>  | <b>0.51</b>  | <b>24.99</b> | 27.32        | 31.86        | <b>11.37</b> | 15.18         | 23.94         |
| US-SP1  | <b>0.59</b> | <b>0.58</b>  | <b>0.59</b>  | <b>14.85</b> | 15.04        | 14.92        | 4.99         | <b>0.58</b>   | 16.13         |
| US-SP3  | <b>0.60</b> | 0.58         | 0.58         | 20.46        | 20.77        | <b>20.34</b> | -16.77       | -20.85        | <b>-5.46</b>  |
| US-SRG  | <b>0.88</b> | <b>0.88</b>  | 0.84         | <b>13.80</b> | <b>13.70</b> | 15.42        | <b>6.06</b>  | 7.49          | 9.96          |
| US-SRM  | <b>0.90</b> | <b>0.91</b>  | 0.88         | 16.12        | <b>15.15</b> | 16.87        | -15.69       | -14.40        | <b>-11.75</b> |
| US-Ton  | <b>0.96</b> | <b>0.95</b>  | <b>0.96</b>  | 21.37        | 22.67        | <b>16.35</b> | -24.53       | -24.45        | <b>-13.50</b> |
| US-Twt  | -0.38       | <b>-0.40</b> | <b>-0.41</b> | <b>51.06</b> | 53.27        | 57.75        | <b>34.92</b> | 38.31         | 46.99         |
| US-Var  | <b>0.91</b> | <b>0.90</b>  | <b>0.92</b>  | 26.79        | 27.67        | <b>22.22</b> | -15.70       | -15.63        | <b>-4.64</b>  |
| US-Vcm  | <b>0.84</b> | <b>0.83</b>  | <b>0.85</b>  | <b>15.40</b> | 15.97        | <b>15.42</b> | -19.02       | -17.75        | <b>-15.35</b> |
| US-Whs  | <b>0.88</b> | <b>0.88</b>  | 0.85         | 15.11        | <b>14.44</b> | 15.96        | -16.79       | -15.37        | <b>-12.89</b> |
| US-Wjs  | <b>0.89</b> | 0.86         | 0.86         | <b>14.04</b> | 15.03        | 15.06        | -17.76       | -16.19        | <b>-15.41</b> |
| US-Wkg  | <b>0.90</b> | <b>0.90</b>  | <b>0.90</b>  | 12.95        | <b>12.37</b> | 12.57        | -3.36        | -2.19         | <b>-0.94</b>  |
| US-Wrc  | <b>0.90</b> | <b>0.89</b>  | 0.86         | 21.60        | 22.59        | <b>21.24</b> | <b>-2.98</b> | -3.79         | 3.80          |
| ZA-Kru  | 0.59        | <b>0.62</b>  | 0.58         | 13.25        | <b>12.58</b> | 13.57        | -13.57       | -17.98        | <b>-6.22</b>  |
| ZM-Mon  | <b>0.26</b> | 0.24         | 0.22         | <b>23.10</b> | 23.29        | 23.93        | -15.84       | -17.00        | <b>-3.82</b>  |
| Average | <b>0.75</b> | <b>0.74</b>  | 0.72         | <b>17.14</b> | <b>17.19</b> | 17.73        | <b>-1.63</b> | <b>-1.18</b>  | 3.86          |

Table S7: Similar to Table S4 but for GPP instead of LE

| Site ID | Correlation Coefficient |             |             | RMSE [W m <sup>-2</sup> ] |             |             | Bias [W m <sup>-2</sup> ] |              |              |
|---------|-------------------------|-------------|-------------|---------------------------|-------------|-------------|---------------------------|--------------|--------------|
|         | WECANN                  | WECANN NDVI | WECANN EVI  | WECANN                    | WECANN NDVI | WECANN EVI  | WECANN                    | WECANN NDVI  | WECANN EVI   |
| AT-Neu  | <b>0.81</b>             | 0.79        | 0.71        | <b>1.55</b>               | 1.61        | 1.95        | <b>-0.66</b>              | <b>-0.68</b> | -2.22        |
| AU-ASM  | 0.68                    | 0.76        | <b>0.82</b> | 0.47                      | <b>0.32</b> | <b>0.36</b> | 0.62                      | 0.51         | <b>-0.09</b> |
| AU-Cpr  | 0.15                    | 0.18        | <b>0.21</b> | 0.73                      | 0.47        | <b>0.36</b> | 0.87                      | 0.63         | <b>-0.07</b> |
| AU-DaP  | 0.76                    | 0.76        | <b>0.78</b> | 1.26                      | <b>1.15</b> | 1.35        | 1.00                      | 1.10         | <b>-0.54</b> |
| AU-DaS  | 0.74                    | 0.79        | <b>0.82</b> | 1.36                      | 0.87        | <b>0.52</b> | <b>0.49</b>               | 0.63         | -0.97        |
| AU-Dry  | 0.63                    | <b>0.70</b> | 0.66        | 1.04                      | 0.75        | <b>0.55</b> | <b>0.43</b>               | 0.78         | -0.62        |
| AU-Stp  | 0.69                    | 0.73        | <b>0.75</b> | 0.89                      | <b>0.46</b> | <b>0.47</b> | 1.04                      | 0.87         | <b>0.04</b>  |
| AU-Tum  | 0.64                    | <b>0.70</b> | 0.68        | 1.44                      | <b>1.30</b> | 1.51        | -1.49                     | <b>-1.00</b> | -3.33        |
| AU-Wom  | <b>0.72</b>             | 0.68        | 0.65        | 1.10                      | 0.93        | <b>0.73</b> | <b>0.25</b>               | 0.33         | -1.45        |
| BE-Bra  | <b>0.93</b>             | <b>0.93</b> | <b>0.92</b> | 0.90                      | 0.88        | <b>0.65</b> | 0.94                      | 0.80         | <b>-0.61</b> |
| BE-Lon  | <b>0.63</b>             | 0.61        | <b>0.63</b> | 2.12                      | 2.09        | <b>1.95</b> | 1.57                      | 1.20         | <b>-0.31</b> |
| BE-Vie  | <b>0.96</b>             | <b>0.95</b> | <b>0.95</b> | 0.88                      | 0.81        | <b>0.61</b> | 0.80                      | <b>0.75</b>  | -0.87        |
| BR-Ji1  | 0.80                    | <b>0.90</b> | 0.83        | 1.53                      | <b>1.14</b> | 1.53        | 1.14                      | <b>0.20</b>  | -3.06        |
| BR-Ji2  | 0.84                    | 0.70        | <b>0.88</b> | 0.82                      | <b>0.97</b> | 0.70        | <b>-1.20</b>              | <b>-1.12</b> | -5.36        |
| BR-Ma2  | <b>0.67</b>             | -0.42       | 0.42        | <b>0.83</b>               | 1.12        | 0.96        | -2.39                     | <b>0.00</b>  | -5.07        |
| BR-Sp1  | <b>0.94</b>             | 0.91        | 0.92        | <b>1.04</b>               | 1.10        | 1.42        | 0.54                      | <b>-0.15</b> | -2.78        |
| CA-Oas  | <b>0.96</b>             | <b>0.97</b> | 0.93        | <b>0.77</b>               | <b>0.81</b> | 1.28        | 0.70                      | 0.70         | <b>-0.59</b> |
| CA-Obs  | <b>0.95</b>             | <b>0.95</b> | <b>0.94</b> | 1.25                      | 1.35        | <b>0.50</b> | 0.84                      | 0.83         | <b>-0.41</b> |
| CA-Qcu  | 0.74                    | <b>0.78</b> | 0.71        | 1.52                      | 1.83        | <b>0.52</b> | 0.70                      | 0.99         | <b>-0.48</b> |
| CA-Qfo  | <b>0.97</b>             | <b>0.96</b> | <b>0.98</b> | 1.10                      | 1.47        | <b>0.29</b> | 1.01                      | 1.30         | <b>-0.17</b> |
| CH-Cha  | <b>0.77</b>             | <b>0.79</b> | <b>0.78</b> | 1.68                      | 1.49        | <b>1.17</b> | <b>-0.32</b>              | <b>-0.22</b> | -1.83        |
| CH-Dav  | <b>0.85</b>             | 0.80        | 0.79        | 1.55                      | 1.45        | <b>0.66</b> | 0.74                      | <b>0.39</b>  | -0.73        |
| CH-Fru  | 0.88                    | <b>0.91</b> | 0.89        | 1.29                      | <b>1.02</b> | 1.11        | <b>0.40</b>               | <b>0.50</b>  | -1.11        |
| CH-Lae  | <b>0.95</b>             | <b>0.96</b> | <b>0.96</b> | 1.15                      | 0.93        | <b>0.52</b> | <b>0.48</b>               | 0.58         | -1.03        |
| CH-Oe2  | <b>0.36</b>             | <b>0.35</b> | <b>0.34</b> | 2.62                      | 2.53        | <b>1.94</b> | 1.38                      | 1.43         | <b>-0.19</b> |
| CZ-BK1  | <b>0.91</b>             | 0.88        | 0.81        | 1.23                      | 1.35        | <b>1.02</b> | <b>0.46</b>               | <b>0.48</b>  | -1.27        |
| CZ-BK2  | <b>0.92</b>             | 0.90        | 0.88        | 1.42                      | 1.49        | <b>0.68</b> | 1.59                      | 1.57         | <b>-0.18</b> |
| DE-Geb  | 0.66                    | 0.72        | <b>0.76</b> | 1.88                      | 1.61        | <b>1.21</b> | 1.59                      | 1.34         | <b>-0.12</b> |
| DE-Lkb  | 0.90                    | <b>0.93</b> | 0.90        | 1.90                      | 1.81        | <b>0.66</b> | 2.42                      | 2.32         | <b>0.54</b>  |
| DE-Lnf  | <b>0.97</b>             | <b>0.98</b> | 0.94        | <b>0.63</b>               | <b>0.54</b> | 1.25        | 0.76                      | <b>0.46</b>  | -0.92        |
| DE-Obe  | <b>0.95</b>             | <b>0.94</b> | 0.89        | <b>0.86</b>               | <b>0.87</b> | 0.94        | 0.54                      | <b>0.31</b>  | -1.10        |
| DE-Seh  | <b>0.62</b>             | <b>0.63</b> | <b>0.61</b> | 2.09                      | 1.96        | <b>1.66</b> | 0.91                      | <b>0.84</b>  | <b>-0.81</b> |
| DE-Spw  | <b>0.83</b>             | <b>0.84</b> | <b>0.83</b> | <b>1.31</b>               | <b>1.22</b> | 1.55        | 0.36                      | <b>0.06</b>  | -1.49        |
| DE-Tha  | <b>0.95</b>             | 0.93        | 0.88        | <b>0.86</b>               | <b>0.89</b> | 1.00        | <b>0.19</b>               | <b>-0.06</b> | -1.49        |
| ES-LgS  | 0.57                    | <b>0.68</b> | 0.39        | 0.64                      | <b>0.34</b> | <b>0.41</b> | 1.32                      | 0.49         | <b>-0.16</b> |
| FI-Hyy  | <b>0.97</b>             | <b>0.96</b> | 0.94        | <b>0.58</b>               | 0.98        | 1.00        | 0.32                      | 0.66         | -0.87        |
| FI-Lom  | <b>0.96</b>             | <b>0.94</b> | <b>0.95</b> | <b>0.62</b>               | 1.03        | <b>0.51</b> | 0.77                      | 0.87         | <b>-0.06</b> |
| IT-Col  | 0.81                    | 0.87        | <b>0.89</b> | 1.26                      | <b>1.11</b> | 1.37        | 1.14                      | 1.13         | <b>-0.39</b> |
| IT-Lav  | <b>0.91</b>             | 0.86        | 0.79        | 1.21                      | <b>1.03</b> | <b>1.01</b> | <b>0.49</b>               | <b>-0.36</b> | -1.75        |
| IT-MBo  | <b>0.92</b>             | <b>0.92</b> | <b>0.92</b> | <b>0.93</b>               | <b>0.96</b> | 1.15        | <b>0.57</b>               | <b>0.56</b>  | -0.86        |
| IT-Ren  | <b>0.90</b>             | 0.88        | 0.88        | 1.15                      | 1.25        | <b>0.79</b> | <b>0.44</b>               | <b>0.43</b>  | -0.98        |
| RU-Tks  | 0.76                    | <b>0.83</b> | 0.80        | 0.55                      | 0.51        | <b>0.31</b> | 0.44                      | <b>0.04</b>  | -0.28        |
| SD-Dem  | 0.67                    | 0.70        | <b>0.75</b> | 0.74                      | <b>0.44</b> | <b>0.47</b> | <b>0.17</b>               | <b>-0.21</b> | -0.41        |
| SN-Dhr  | 0.27                    | 0.29        | <b>0.32</b> | 2.48                      | <b>2.26</b> | <b>2.20</b> | <b>-0.92</b>              | -1.34        | -1.87        |
| US-AR1  | <b>0.71</b>             | 0.69        | 0.62        | 1.09                      | <b>0.71</b> | <b>0.64</b> | 1.04                      | 0.63         | <b>-0.08</b> |
| US-AR2  | 0.70                    | <b>0.72</b> | 0.69        | 1.16                      | 0.65        | <b>0.44</b> | 1.27                      | 0.86         | <b>0.16</b>  |
| US-ARM  | <b>0.57</b>             | 0.51        | 0.35        | 1.68                      | 1.38        | <b>1.26</b> | 2.09                      | 1.08         | <b>-0.11</b> |
| US-GLE  | 0.84                    | <b>0.94</b> | 0.92        | 0.53                      | <b>0.33</b> | 0.64        | 0.24                      | <b>0.03</b>  | -0.47        |
| US-Ha1  | 0.94                    | 0.94        | <b>0.96</b> | 1.11                      | 1.36        | <b>0.65</b> | 1.35                      | 1.71         | <b>-0.16</b> |
| US-KFS  | <b>0.79</b>             | <b>0.80</b> | 0.77        | <b>1.94</b>               | <b>1.89</b> | 2.32        | <b>-1.75</b>              | -2.40        | -3.90        |
| US-Kon  | 0.71                    | 0.76        | <b>0.79</b> | <b>3.26</b>               | <b>3.20</b> | 3.70        | <b>-3.75</b>              | -4.46        | -5.84        |

|         |             |             |             |             |             |             |              |              |              |
|---------|-------------|-------------|-------------|-------------|-------------|-------------|--------------|--------------|--------------|
| US-Me2  | <b>0.87</b> | 0.85        | <b>0.87</b> | <b>0.71</b> | <b>0.76</b> | 1.11        | <b>-0.69</b> | <b>-0.74</b> | -1.77        |
| US-Me3  | <b>0.83</b> | 0.70        | 0.72        | 0.83        | 0.83        | <b>0.42</b> | 0.58         | <b>0.45</b>  | -0.53        |
| US-Me6  | <b>0.65</b> | 0.60        | <b>0.64</b> | 0.85        | 0.89        | <b>0.67</b> | <b>0.35</b>  | <b>0.34</b>  | -0.66        |
| US-MMS  | 0.92        | 0.93        | <b>0.95</b> | 1.16        | 1.02        | <b>0.89</b> | 1.53         | 1.16         | <b>-0.33</b> |
| US-Ne1  | <b>0.77</b> | 0.73        | 0.75        | <b>2.35</b> | 2.51        | 2.70        | 0.87         | <b>0.44</b>  | -0.69        |
| US-Ne2  | <b>0.75</b> | 0.72        | <b>0.75</b> | <b>2.27</b> | 2.36        | 2.47        | 1.06         | 0.65         | <b>-0.44</b> |
| US-Ne3  | <b>0.72</b> | 0.69        | <b>0.71</b> | 2.11        | 2.19        | <b>2.06</b> | 1.56         | 1.14         | <b>0.00</b>  |
| US-NR1  | 0.86        | <b>0.96</b> | <b>0.96</b> | 0.60        | <b>0.37</b> | 0.71        | <b>-0.02</b> | 0.26         | -0.54        |
| US-Seg  | 0.50        | <b>0.44</b> | <b>0.45</b> | <b>0.72</b> | <b>0.72</b> | <b>0.73</b> | <b>-0.16</b> | -0.57        | -0.89        |
| US-Ses  | 0.66        | 0.68        | <b>0.73</b> | <b>0.49</b> | <b>0.44</b> | <b>0.46</b> | 0.40         | <b>-0.01</b> | -0.34        |
| US-SRG  | 0.71        | 0.80        | <b>0.82</b> | 0.77        | <b>0.42</b> | <b>0.46</b> | 0.69         | 0.45         | <b>-0.10</b> |
| US-SRM  | 0.61        | 0.82        | <b>0.85</b> | 0.89        | <b>0.37</b> | <b>0.26</b> | 0.88         | 0.65         | <b>0.08</b>  |
| US-Sta  | <b>0.74</b> | 0.60        | 0.61        | 0.79        | 0.75        | <b>0.36</b> | 0.66         | 0.38         | <b>-0.12</b> |
| US-Ton  | <b>0.47</b> | 0.36        | 0.41        | 1.40        | 1.42        | <b>0.82</b> | 1.44         | 1.42         | <b>-0.10</b> |
| US-Twt  | 0.49        | 0.40        | <b>0.62</b> | <b>2.14</b> | <b>2.17</b> | <b>2.14</b> | 1.33         | <b>0.37</b>  | -0.91        |
| US-Var  | <b>0.27</b> | 0.05        | 0.16        | 1.56        | 1.83        | <b>1.31</b> | 1.08         | 1.09         | <b>-0.17</b> |
| US-Whs  | 0.69        | <b>0.84</b> | <b>0.85</b> | 0.97        | 0.44        | <b>0.18</b> | 1.07         | 0.87         | <b>0.28</b>  |
| US-Wkg  | 0.55        | 0.77        | <b>0.82</b> | 0.72        | <b>0.35</b> | <b>0.29</b> | 0.77         | 0.53         | <b>0.06</b>  |
| ZA-Kru  | 0.65        | <b>0.69</b> | <b>0.68</b> | 1.51        | 1.34        | <b>0.99</b> | 1.30         | 1.73         | <b>-0.30</b> |
| ZM-Mon  | <b>0.62</b> | 0.57        | 0.50        | 1.51        | <b>1.23</b> | <b>1.15</b> | 1.59         | 1.42         | <b>-0.28</b> |
| Average | <b>0.75</b> | <b>0.74</b> | <b>0.75</b> | 1.24        | 1.16        | <b>1.02</b> | 0.57         | <b>0.43</b>  | -0.94        |

## References

- Anderson-Teixeira, K.J., Delong, J.P., Fox, A.M., Brese, D.A., Litvak, M.E., 2011. Differential responses of production and respiration to temperature and moisture drive the carbon balance across a climatic gradient in New Mexico. *Glob. Chang. Biol.* 17, 410–424. doi:10.1111/j.1365-2486.2010.02269.x
- Anthoni, P.M., Freibauer, A., Kolle, O., Schulze, E.-D., 2004a. Winter wheat carbon exchange in Thuringia, Germany. *Agric. For. Meteorol.* 121, 55–67. doi:10.1016/S0168-1923(03)00162-X
- Anthoni, P.M., Knohl, A., Rebmann, C., Freibauer, A., Mund, M., Ziegler, W., Kolle, O., Schulze, E.-D., 2004b. Forest and agricultural land-use-dependent CO<sub>2</sub> exchange in Thuringia, Germany. *Glob. Chang. Biol.* 10, 2005–2019. doi:10.1111/j.1365-2486.2004.00863.x
- Araújo, A.C., Nobre, A.D., Kruijt, B., Elbers, J.A., Dallarosa, R., Stefani, P., von Randow, C., Manzi, A.O., Culf, A.D., Gash, J.H.C., Valentini, R., Kabat, P., 2002. Comparative measurements of carbon dioxide fluxes from two nearby towers in a central Amazonian rainforest: The Manaus LBA site. *J. Geophys. Res.* 107, 8090. doi:10.1029/2001JD000676
- Archibald, S.A., Kirton, A., van der Merwe, M.R., Scholes, R.J., Williams, C.A., Hanan, N., 2009. Drivers of inter-annual variability in Net Ecosystem Exchange in a semi-arid savanna ecosystem, South Africa. *Biogeosciences* 6, 251–266. doi:10.5194/bg-6-251-2009
- Ardo, J., Molder, M., El-Tahir, B.A., Elkhidir, H.A.M., 2008. Seasonal variation of carbon fluxes in a sparse savanna in semi arid Sudan. *Carbon Balance Manag.* 3, 7. doi:10.1186/1750-0680-3-7
- Aubinet, M., Chermanne, B., Vandenhaute, M., Longdoz, B., Yernaux, M., Laitat, E., 2001. Long term carbon dioxide exchange above a mixed forest in the Belgian Ardennes. *Agric. For. Meteorol.* 108, 293–315. doi:10.1016/S0168-1923(01)00244-1
- Aurela, M., Lohila, A., Tuovinen, J.-P., Hatakka, J., Riutta, T., Laurila, T., 2009. Carbon dioxide exchange on a northern boreal fen. *Boreal Environ. Res* 14, 699–710.
- Barr, A.G., van der Kamp, G., Black, T.A., McCaughey, J.H., Nestic, Z., 2012. Energy balance closure at the BERMS flux towers in relation to the water balance of the White Gull Creek watershed 1999–2009. *Agric. For. Meteorol.* 153, 3–13. doi:10.1016/j.agrformet.2011.05.017
- Bergeron, O., Margolis, H.A., Black, T.A., Coursolle, C., Dunn, A.L., Barr, A.G., Wofsy, S.C., 2007. Comparison of carbon dioxide fluxes over three boreal black spruce forests in Canada. *Glob. Chang. Biol.* 13, 89–107. doi:10.1111/j.1365-2486.2006.01281.x
- Beringer, J., Hutley, L.B., McHugh, I., Arndt, S.K., Campbell, D., Cleugh, H.A., Cleverly, J., Resco de Dios, V., Eamus, D., Evans, B., Ewenz, C., Grace, P., Griebel, A., Haverd, V., Hinko-Najera, N., Huete, A., Isaac, P., Kanniah, K., Leuning, R., Liddell, M.J., Macfarlane, C., Meyer, W., Moore, C., Pendall, E., Phillips, A., Phillips, R.L., Prober, S.M., Restrepo-Coupe, N., Rutledge, S., Schroder, I., Silberstein, R., Southall, P., Yee, M.S., Tapper, N.J., van Gorsel, E., Vote, C., Walker, J., Wardlaw, T., 2016. An introduction to the Australian and New Zealand flux tower network – OzFlux. *Biogeosciences* 13, 5895–5916. doi:10.5194/bg-13-5895-2016
- Bernhofer, C., Aubinet, M., Clement, R., Grelle, A., Grünwald, T., Ibrom, A., Jarvis, P., Rebmann, C., Schulze, E.-D., Tenhunen, J.D., 2003. Spruce Forests (Norway and Sitka Spruce, Including Douglas Fir): Carbon and Water Fluxes and Balances, Ecological and Ecophysiological Determinants, in: Valentini, R. (Ed.), *Fluxes of Carbon, Water and Energy of European Forests*. Springer Berlin Heidelberg, Berlin, Heidelberg, pp. 99–123. doi:10.1007/978-3-662-05171-9\_6
- Billesbach, D., Bradford, J., Torn, M., 2016. AmeriFlux US-AR1 ARM USDA UNL OSU Woodward Switchgrass 1. doi:10.17190/AMF/1246137
- Brunsell, N.A., Ham, J.M., Owensby, C.E., 2008. Assessing the multi-resolution information content of remotely sensed variables and elevation for evapotranspiration in a tall-grass prairie environment. *Remote Sens. Environ.* 112, 2977–2987. doi:10.1016/j.rse.2008.02.002
- Brunsell, N.A., Nippert, J.B., Buck, T.L., 2014. Impacts of seasonality and surface heterogeneity on water-use efficiency in

mesic grasslands. *Ecohydrology*. doi:10.1002/eco.1455

- Cescatti, A., Marcolla, B., 2004. Drag coefficient and turbulence intensity in conifer canopies. *Agric. For. Meteorol.* 121, 197–206. doi:10.1016/j.agrformet.2003.08.028
- Clark, K.L., Skowronski, N., Hom, J., 2010. Invasive insects impact forest carbon dynamics. *Glob. Chang. Biol.* 16, 88–101. doi:10.1111/j.1365-2486.2009.01983.x
- Cleverly, J., Boulain, N., Villalobos-Vega, R., Grant, N., Faux, R., Wood, C., Cook, P.G., Yu, Q., Leigh, A., Eamus, D., 2013. Dynamics of component carbon fluxes in a semi-arid Acacia woodland, central Australia. *J. Geophys. Res. Biogeosciences* 118, 1168–1185. doi:10.1002/jgrg.20101
- de Pury, D.G.G., Ceulemans, R., 1997. Scaling-Up Carbon Fluxes from Leaves to Stands in a Patchy Coniferous / Deciduous Forest, in: Mohren, G.M.J., Kramer, K., Sabaté, S. (Eds.), *Impacts of Global Change on Tree Physiology and Forest Ecosystems: Proceedings of the International Conference on Impacts of Global Change on Tree Physiology and Forest Ecosystems*, Held 26--29 November 1996, Wageningen, The Netherlands. Springer Netherlands, Dordrecht, pp. 263–272. doi:10.1007/978-94-015-8949-9\_34
- Detto, M., Baldocchi, D., Katul, G.G., 2010. Scaling Properties of Biologically Active Scalar Concentration Fluctuations in the Atmospheric Surface Layer over a Managed Peatland. *Boundary-Layer Meteorol.* 136, 407–430. doi:10.1007/s10546-010-9514-z
- Dore, S., Montes-Helu, M., Hart, S.C., Hungate, B.A., Koch, G.W., Moon, J.B., Finkral, A.J., Kolb, T.E., 2012. Recovery of ponderosa pine ecosystem carbon and water fluxes from thinning and stand-replacing fire. *Glob. Chang. Biol.* 18, 3171–3185. doi:10.1111/j.1365-2486.2012.02775.x
- Eamus, D., Cleverly, J., Boulain, N., Grant, N., Faux, R., Villalobos-Vega, R., 2013. Carbon and water fluxes in an arid-zone Acacia savanna woodland: An analyses of seasonal patterns and responses to rainfall events. *Agric. For. Meteorol.* 182–183, 225–238. doi:10.1016/j.agrformet.2013.04.020
- Eder, F., Schmidt, M., Damian, T., Träumner, K., Mauder, M., 2015. Mesoscale Eddies Affect Near-Surface Turbulent Exchange: Evidence from Lidar and Tower Measurements. *J. Appl. Meteorol. Climatol.* 54, 189–206. doi:10.1175/JAMC-D-14-0140.1
- Eugster, W., Zeeman, M.J., 2006. Micrometeorological techniques to measure ecosystem-scale greenhouse gas fluxes for model validation and improvement. *Int. Congr. Ser.* 1293, 66–75. doi:10.1016/j.ics.2006.05.001
- Eugster, W., Zeyer, K., Zeeman, M., Michna, P., Zingg, A., Buchmann, N., Emmenegger, L., 2007. Methodical study of nitrous oxide eddy covariance measurements using quantum cascade laser spectrometry over a Swiss forest. *Biogeosciences* 4, 927–939. doi:10.5194/bg-4-927-2007
- Euskirchen, E.S., Bret-Harte, M.S., Scott, G.J., Edgar, C., Shaver, G.R., 2012. Seasonal patterns of carbon dioxide and water fluxes in three representative tundra ecosystems in northern Alaska. *Ecosphere* 3, art4. doi:10.1890/ES11-00202.1
- Ewers, B., Pendall, E., 2009. AmeriFlux US-Sta Saratoga. doi:10.17190/AMF/1246831
- Falk, M., Wharton, S., Schroeder, M., Ustin, S., U, K.T.P., 2008. Flux partitioning in an old-growth forest: seasonal and interannual dynamics. *Tree Physiol.* 28, 509–520. doi:10.1093/treephys/28.4.509
- Fischer, M.L., Billesbach, D.P., Berry, J.A., Riley, W.J., Torn, M.S., 2007. Spatiotemporal Variations in Growing Season Exchanges of CO<sub>2</sub>, H<sub>2</sub>O, and Sensible Heat in Agricultural Fields of the Southern Great Plains. *Earth Interact.* 11, 1–21. doi:10.1175/EI231.1
- Gholz, H.L., Clark, K.L., 2002. Energy exchange across a chronosequence of slash pine forests in Florida. *Agric. For. Meteorol.* 112, 87–102. doi:10.1016/S0168-1923(02)00059-X
- Gilmanov, T.G., Tieszen, L.L., Wylie, B.K., Flanagan, L.B., Frank, A.B., Haferkamp, M.R., Meyers, T.P., Morgan, J.A., 2005. Integration of CO<sub>2</sub> flux and remotely-sensed data for primary production and ecosystem respiration analyses in the Northern Great Plains: potential for quantitative spatial extrapolation. *Glob. Ecol. Biogeogr.* 14, 271–292. doi:10.1111/j.1466-822X.2005.00151.x



- Griffis, T.J., Zhang, J., Baker, J.M., Kljun, N., Billmark, K., 2007. Determining carbon isotope signatures from micrometeorological measurements: Implications for studying biosphere-atmosphere exchange processes. *Boundary-Layer Meteorol.* 123, 295–316. doi:10.1007/s10546-006-9143-8
- Gu, L., Meyers, T., Pallardy, S.G., Hanson, P.J., Yang, B., Heuer, M., Hosman, K.P., Riggs, J.S., Sluss, D., Wullschlegel, S.D., 2006. Direct and indirect effects of atmospheric conditions and soil moisture on surface energy partitioning revealed by a prolonged drought at a temperate forest site. *J. Geophys. Res.* 111, D16102. doi:10.1029/2006JD007161
- Hatala, J.A., Detto, M., Sonnentag, O., Deverel, S.J., Verfaillie, J., Baldocchi, D.D., 2012. Greenhouse gas (CO<sub>2</sub>, CH<sub>4</sub>, H<sub>2</sub>O) fluxes from drained and flooded agricultural peatlands in the Sacramento-San Joaquin Delta. *Agric. Ecosyst. Environ.* 150, 1–18. doi:10.1016/j.agee.2012.01.009
- Hinko-Najera, N., Isaac, P., Beringer, J., van Gorsel, E., Ewenz, C., McHugh, I., Exbrayat, J.-F., Livesley, S.J., Arndt, S.K., 2017. Net ecosystem carbon exchange of a dry temperate eucalypt forest. *Biogeosciences* 14, 3781–3800. doi:10.5194/bg-14-3781-2017
- Jenkins, J.P., Richardson, A.D., Braswell, B.H., Ollinger, S.V., Hollinger, D.Y., Smith, M.-L., 2007. Refining light-use efficiency calculations for a deciduous forest canopy using simultaneous tower-based carbon flux and radiometric measurements. *Agric. For. Meteorol.* 143, 64–79. doi:10.1016/j.agrformet.2006.11.008
- Kutsch, W.L., Aubinet, M., Buchmann, N., Smith, P., Osborne, B., Eugster, W., Wattenbach, M., Schrupf, M., Schulze, E.D., Tomelleri, E., Ceschia, E., Bernhofer, C., Béziat, P., Carrara, A., Di Tommasi, P., Grünwald, T., Jones, M., Magliulo, V., Marloie, O., Moureaux, C., Olioso, A., Sanz, M.J., Saunders, M., Søggaard, H., Ziegler, W., 2010. The net biome production of full crop rotations in Europe. *Agric. Ecosyst. Environ.* 139, 336–345. doi:10.1016/j.agee.2010.07.016
- Kwon, H., Law, B.E., Thomas, C.K., Johnson, B.G., 2017. The influence of hydrological variability on inherent water use efficiency in forests of contrasting composition, age, and precipitation regimes in the Pacific Northwest. *Agric. For. Meteorol.* doi:10.1016/j.agrformet.2017.08.006
- Lohila, A., Aurela, M., Hatakka, J., Pihlatie, M., Minkkinen, K., Penttilä, T., Laurila, T., 2010. Responses of N<sub>2</sub>O fluxes to temperature, water table and N deposition in a northern boreal fen. *Eur. J. Soil Sci.* 61, 651–661. doi:10.1111/j.1365-2389.2010.01265.x
- Ma, S., Baldocchi, D.D., Xu, L., Hehn, T., 2007. Inter-annual variability in carbon dioxide exchange of an oak/grass savanna and open grassland in California. *Agric. For. Meteorol.* 147, 157–171. doi:10.1016/j.agrformet.2007.07.008
- Marcolla, B., Cescatti, A., Manca, G., Zorer, R., Cavagna, M., Fiora, A., Gianelle, D., Rodeghiero, M., Sottocornola, M., Zampedri, R., 2011. Climatic controls and ecosystem responses drive the inter-annual variability of the net ecosystem exchange of an alpine meadow. *Agric. For. Meteorol.* 151, 1233–1243. doi:10.1016/j.agrformet.2011.04.015
- Marcolla, B., Cescatti, A., Montagnani, L., Manca, G., Kerschbaumer, G., Minerbi, S., 2005. Importance of advection in the atmospheric CO<sub>2</sub> exchanges of an alpine forest. *Agric. For. Meteorol.* 130, 193–206. doi:10.1016/j.agrformet.2005.03.006
- Margolis, H.A., 2001. AmeriFlux CA-Qcu Quebec - Eastern Boreal, Black Spruce/Jack Pine Cutover. doi:10.17190/AMF/1246828
- Massman, W.J., 2000. A simple method for estimating frequency response corrections for eddy covariance systems. *Agric. For. Meteorol.* 104, 185–198. doi:10.1016/S0168-1923(00)00164-7
- Matamala, R., Jastrow, J.D., Miller, R.M., Garten, C.T., 2008. TEMPORAL CHANGES IN C AND N STOCKS OF RESTORED PRAIRIE: IMPLICATIONS FOR C SEQUESTRATION STRATEGIES. *Ecol. Appl.* 18, 1470–1488. doi:10.1890/07-1609.1
- Merbold, L., Ardö, J., Arneth, A., Scholes, R.J., Nouvellon, Y., de Grandcourt, A., Archibald, S., Bonnefond, J.M., Boulain, N., Brueggemann, N., Bruemmer, C., Cappelaere, B., Ceschia, E., El-Khidir, H.A.M., El-Tahir, B.A., Falk, U., Lloyd, J., Kergoat, L., Le Dantec, V., Mougou, E., Muchinda, M., Mukelabai, M.M., Ramier, D., Rouspard, O., Timouk, F., Veenendaal, E.M., Kutsch, W.L., 2009. Precipitation as driver of carbon fluxes in 11 African ecosystems. *Biogeosciences* 6, 1027–1041. doi:10.5194/bg-6-1027-2009

- Meyer, W.S., Kondrlovà, E., Koerber, G.R., 2015. Evaporation of perennial semi-arid woodland in southeastern Australia is adapted for irregular but common dry periods. *Hydrol. Process.* 29, 3714–3726. doi:10.1002/hyp.10467
- Monson, R.K., Turnipseed, A.A., Sparks, J.P., Harley, P.C., Scott-Denton, L.E., Sparks, K., Huxman, T.E., 2002. Carbon sequestration in a high-elevation, subalpine forest. *Glob. Chang. Biol.* 8, 459–478. doi:10.1046/j.1365-2486.2002.00480.x
- Moureaux, C., Debacq, A., Bodson, B., Heinesch, B., Aubinet, M., 2006. Annual net ecosystem carbon exchange by a sugar beet crop. *Agric. For. Meteorol.* 139, 25–39. doi:10.1016/j.agrformet.2006.05.009
- Noormets, A., Gavazzi, M.J., McNulty, S.G., Domec, J.C., Sun, G.E., King, J.S., Chen, J., 2010. Response of carbon fluxes to drought in a coastal plain loblolly pine forest. *Glob. Chang. Biol.* 16, 272–287. doi:10.1111/j.1365-2486.2009.01928.x
- Petrie, M.D., Collins, S.L., Swann, A.M., Ford, P.L., Litvak, M.E., 2015. Grassland to shrubland state transitions enhance carbon sequestration in the northern Chihuahuan Desert. *Glob. Chang. Biol.* 21, 1226–1235. doi:10.1111/gcb.12743
- Rambal, S., Joffre, R., Ourcival, J.M., Cavender-Bares, J., Rocheteau, A., 2004. The growth respiration component in eddy CO<sub>2</sub> flux from a *Quercus ilex* mediterranean forest. *Glob. Chang. Biol.* 10, 1460–1469. doi:10.1111/j.1365-2486.2004.00819.x
- Reverter, B.R., Sánchez-Cañete, E.P., Resco, V., Serrano-Ortiz, P., Oyonarte, C., Kowalski, A.S., 2010. Analyzing the major drivers of NEE in a Mediterranean alpine shrubland. *Biogeosciences* 7, 2601–2611. doi:10.5194/bg-7-2601-2010
- Rocha, H.R. da, Freitas, H.C., Rosolem, R., Juárez, R.I.N., Tannus, R.N., Ligo, M.A., Cabral, O.M.R., Dias, M.A.F.S., 2002. Measurements of CO<sub>2</sub> exchange over a woodland savanna (*Cerrado Sensu stricto*) in southeast Brasil. *Biota Neotrop.* 2, 1–11. doi:10.1590/S1676-06032002000100009
- Schmid, H., Grimmond, C.S., Cropley, F., Offerle, B., Su, H.-B., 2000. Measurements of CO<sub>2</sub> and energy fluxes over a mixed hardwood forest in the mid-western United States. *Agric. For. Meteorol.* 103, 357–374. doi:10.1016/S0168-1923(00)00140-4
- Scholes, R.J., Gureja, N., Giannecchini, M., Dovie, D., Wilson, B., Davidson, N., Piggott, K., McLoughlin, C., Van der Velde, K., Freeman, A., Bradley, S., Smart, R., Ndala, S., 2001. The environment and vegetation of the flux measurement site near Skukuza, Kruger National Park. *Koedoe* 44. doi:10.4102/koedoe.v44i1.187
- Scott, R.L., Biederman, J.A., Hamerlynck, E.P., Barron-Gafford, G.A., 2015. The carbon balance pivot point of southwestern U.S. semiarid ecosystems: Insights from the 21st century drought. *J. Geophys. Res. Biogeosciences* 120, 2612–2624. doi:10.1002/2015JG003181
- Scott, R.L., Hamerlynck, E.P., Jenerette, G.D., Moran, M.S., Barron-Gafford, G.A., 2010. Carbon dioxide exchange in a semidesert grassland through drought-induced vegetation change. *J. Geophys. Res.* 115, G03026. doi:10.1029/2010JG001348
- Scott, R.L., Jenerette, G.D., Potts, D.L., Huxman, T.E., 2009. Effects of seasonal drought on net carbon dioxide exchange from a woody-plant-encroached semiarid grassland. *J. Geophys. Res.* 114, G04004. doi:10.1029/2008JG000900
- Suni, T., Rinne, J., Reissell, A., Altimir, N., Keronen, P., Rannik, U., Maso, M.D., Kulmala, M., Vesala, T., 2003. Long-term measurements of surface fluxes above a Scots pine forest in Hyytiälä, southern Finland, 1996–2001. *Boreal Environ. Res.* 8, 287–302.
- Tagesson, T., Fensholt, R., Cropley, F., Guiro, I., Horion, S., Ehammer, A., Ardö, J., 2015. Dynamics in carbon exchange fluxes for a grazed semi-arid savanna ecosystem in West Africa. *Agric. Ecosyst. Environ.* 205, 15–24. doi:10.1016/j.agee.2015.02.017
- Urbanski, S., Barford, C., Wofsy, S., Kucharik, C., Pyle, E., Budney, J., McKain, K., Fitzjarrald, D., Czirkowsky, M., Munger, J.W., 2007. Factors controlling CO<sub>2</sub> exchange on timescales from hourly to decadal at Harvard Forest. *J. Geophys. Res.* 112, G02020. doi:10.1029/2006JG000293
- Uttal, T., Starkweather, S., Drummond, J.R., Vihma, T., Makshtas, A.P., Darby, L.S., Burkhart, J.F., Cox, C.J., Schmeisser, L.N., Haiden, T., Maturilli, M., Shupe, M.D., De Boer, G., Saha, A., Grachev, A.A., Crepinsek, S.M., Bruhwiler, L.,

- Goodison, B., McArthur, B., Walden, V.P., Dlugokencky, E.J., Persson, P.O.G., Lesins, G., Laurila, T., Ogren, J.A., Stone, R., Long, C.N., Sharma, S., Massling, A., Turner, D.D., Stanitski, D.M., Asmi, E., Aurela, M., Skov, H., Eleftheriadis, K., Virkkula, A., Platt, A., Førland, E.J., Iijima, Y., Nielsen, I.E., Bergin, M.H., Candler, L., Zimov, N.S., Zimov, S.A., O'Neill, N.T., Fogal, P.F., Kivi, R., Konopleva-Akish, E.A., Verlinde, J., Kustov, V.Y., Vasel, B., Ivakhov, V.M., Viisanen, Y., Intrieri, J.M., 2016. International Arctic Systems for Observing the Atmosphere: An International Polar Year Legacy Consortium. *Bull. Am. Meteorol. Soc.* 97, 1033–1056. doi:10.1175/BAMS-D-14-00145.1
- Valentini, R., Angelis, P., Matteucci, G., Monaco, R., Dore, S., Mucnozza, G.E.S., 1996. Seasonal net carbon dioxide exchange of a beech forest with the atmosphere. *Glob. Chang. Biol.* 2, 199–207. doi:10.1111/j.1365-2486.1996.tb00072.x
- Verma, S.B., Dobermann, A., Cassman, K.G., Walters, D.T., Knops, J.M., Arkebauer, T.J., Suyker, A.E., Burba, G.G., Amos, B., Yang, H., Ginting, D., Hubbard, K.G., Gitelson, A.A., Walter-Shea, E.A., 2005. Annual carbon dioxide exchange in irrigated and rainfed maize-based agroecosystems. *Agric. For. Meteorol.* 131, 77–96. doi:10.1016/j.agrformet.2005.05.003
- von Randow, C., Manzi, A.O., Kruijt, B., de Oliveira, P.J., Zanchi, F.B., Silva, R.L., Hodnett, M.G., Gash, J.H.C., Elbers, J.A., Waterloo, M.J., Cardoso, F.L., Kabat, P., 2004. Comparative measurements and seasonal variations in energy and carbon exchange over forest and pasture in South West Amazonia. *Theor. Appl. Climatol.* 78, 5–26. doi:10.1007/s00704-004-0041-z
- Wang, K., Dickinson, R.E., Wild, M., Liang, S., 2010. Evidence for decadal variation in global terrestrial evapotranspiration between 1982 and 2002: 1. Model development. *J. Geophys. Res.* 115, D20112. doi:10.1029/2009JD013671
- Westergaard-Nielsen, A., Lund, M., Hansen, B.U., Tamstorf, M.P., 2013. Camera derived vegetation greenness index as proxy for gross primary production in a low Arctic wetland area. *ISPRS J. Photogramm. Remote Sens.* 86, 89–99. doi:10.1016/j.isprsjprs.2013.09.006
- Wohlfahrt, G., Hammerle, A., Haslwanter, A., Bahn, M., Tappeiner, U., Cernusca, A., 2008. Seasonal and inter-annual variability of the net ecosystem CO<sub>2</sub> exchange of a temperate mountain grassland: Effects of weather and management. *J. Geophys. Res.* 113, D08110. doi:10.1029/2007JD009286
- Zha, T.S., Barr, A.G., Bernier, P.-Y., Lavigne, M.B., Trofymow, J.A., Amiro, B.D., Arain, M.A., Bhatti, J.S., Black, T.A., Margolis, H.A., McCaughey, J.H., Xing, Z.S., Van Rees, K.C.J., Coursolle, C., 2013. Gross and aboveground net primary production at Canadian forest carbon flux sites. *Agric. For. Meteorol.* 174–175, 54–64. doi:10.1016/j.agrformet.2013.02.004
- Zweifel, R., Eugster, W., Etzold, S., Dobbertin, M., Buchmann, N., Häslner, R., 2010. Link between continuous stem radius changes and net ecosystem productivity of a subalpine Norway spruce forest in the Swiss Alps. *New Phytol.* 187, 819–830. doi:10.1111/j.1469-8137.2010.03301.x
